# Supplementary material for: Lignans and clerodane diterpenoids from Tinospora sinensis
Source: Royal Society of Chemistry journal article supplement (doi:10.1039/d0ra04917d), 2020-01-01
Supplement: d0ra04917d1.pdf [file d0ra04917d1.pdf]

Lignans and clerodane diterpenoids from *Tinospora sinensis*

Chumao Wen<sup>‡a</sup>, Jun Li<sup>‡b</sup>, Xiaoshi Xu<sup>b</sup>, Qingqing Li<sup>b</sup>, Yitong Li<sup>b</sup>, Yu Chen<sup>c\*</sup>,

Guangzhong Yang<sup>b\*</sup>

<sup>a</sup> *College of Biomedical Engineering, South-Central University for Nationalities,*

*Wuhan 430074, P. R. China*

<sup>b</sup> *School of Pharmaceutical Sciences, South-Central University for Nationalities,*

*Wuhan 430074, P. R. China*

<sup>c</sup> *College of Chemistry and Material Sciences, South-Central University for*

*Nationalities, Wuhan 430074, P. R. China*

---

<sup>‡</sup> These authors contributed equally to this work.

\*Corresponding authors. Tel./fax: +86 27 6784 1196

E-mail address: chenyuwh888@126.com (Y. Chen); yanggz888@126.com (G. Yang)

## Electronic Supplementary Information

|                                                               |    |
|---------------------------------------------------------------|----|
| Fig S1. The $^1\text{H}$ -NMR spectrum of 1 .....             | 1  |
| Fig S2. The $^{13}\text{C}$ -NMR spectrum of 1 .....          | 2  |
| Fig S3. $^{13}\text{C}$ -NMR-DEPT spectrum of 1 .....         | 2  |
| Fig S4. $^1\text{H}$ - $^1\text{H}$ COSY spectrum of 1 .....  | 3  |
| Fig S5. HSQC spectrum of 1 .....                              | 3  |
| Fig S6. HMBC spectrum of 1 .....                              | 4  |
| Fig S7. ROESY spectrum of 1 .....                             | 4  |
| Fig S8. UV spectrum of 1 .....                                | 5  |
| Fig S9. HR-ESI-MS of 1 .....                                  | 5  |
| Fig S10. The $^1\text{H}$ -NMR spectrum of 2 .....            | 6  |
| Fig S11. The $^{13}\text{C}$ -NMR spectrum of 2 .....         | 6  |
| Fig S12. $^{13}\text{C}$ -NMR-DEPT spectrum of 2 .....        | 7  |
| Fig S13. $^1\text{H}$ - $^1\text{H}$ COSY spectrum of 2 ..... | 7  |
| Fig S14. HSQC spectrum of 2 .....                             | 8  |
| Fig S15. HMBC spectrum of 2 .....                             | 8  |
| Fig S16. ROESY spectrum of 2 .....                            | 9  |
| Fig S17. UV spectrum of 2 .....                               | 9  |
| Fig S18. HR-ESI-MS of 2 .....                                 | 10 |
| Fig S19. The $^1\text{H}$ -NMR spectrum of 3 .....            | 10 |
| Fig S20. The $^{13}\text{C}$ -NMR spectrum of 3 .....         | 11 |
| Fig S21. $^{13}\text{C}$ -NMR-DEPT spectrum of 3 .....        | 11 |
| Fig S22. $^1\text{H}$ - $^1\text{H}$ COSY spectrum of 3 ..... | 12 |
| Fig S23. HSQC spectrum of 3 .....                             | 12 |
| Fig S24. HMBC spectrum of 3 .....                             | 13 |
| Fig S25. ROESY spectrum of 3 .....                            | 13 |
| Fig S27. HR-ESI-MS of 3 .....                                 | 14 |
| Fig S28. The $^1\text{H}$ -NMR spectrum of 4 .....            | 15 |
| Fig S29. The $^{13}\text{C}$ -NMR spectrum of 4 .....         | 15 |
| Fig S30. $^{13}\text{C}$ -NMR-DEPT spectrum of 4 .....        | 16 |
| Fig S31. $^1\text{H}$ - $^1\text{H}$ COSY spectrum of 4 ..... | 16 |
| Fig S32. HSQC spectrum of 4 .....                             | 17 |
| Fig S33. HMBC spectrum of 4 .....                             | 17 |
| Fig S34. ROESY spectrum of 4 .....                            | 18 |
| Fig S35. UV spectrum of 4 .....                               | 18 |
| Fig S36. HR-ESI-MS of 4 .....                                 | 19 |
| Fig S37. The $^1\text{H}$ -NMR spectrum of 9 .....            | 19 |
| Fig S38. The $^{13}\text{C}$ -NMR spectrum of 9 .....         | 20 |
| Fig S39. $^{13}\text{C}$ -NMR-DEPT spectrum of 9 .....        | 20 |
| Fig S40. $^1\text{H}$ - $^1\text{H}$ COSY spectrum of 9 ..... | 21 |

|                                                                                                                                       |    |
|---------------------------------------------------------------------------------------------------------------------------------------|----|
| Fig S41. HSQC spectrum of 9 .....                                                                                                     | 21 |
| Fig S42. HMBC spectrum of 9 .....                                                                                                     | 22 |
| Fig S43. ROESY spectrum of 9 .....                                                                                                    | 22 |
| Fig S44. UV spectrum of 9 .....                                                                                                       | 23 |
| Fig S45. HR-ESI-MS of 9 .....                                                                                                         | 23 |
| Fig S46. The <sup>1</sup> H-NMR spectrum of 11 .....                                                                                  | 24 |
| Fig S47. The <sup>13</sup> C-NMR spectrum of 11 .....                                                                                 | 24 |
| Fig S48. <sup>13</sup> C-NMR-DEPT spectrum of 11 .....                                                                                | 25 |
| Fig S49. <sup>1</sup> H- <sup>1</sup> H COSY spectrum of 11 .....                                                                     | 25 |
| Fig S50. HSQC spectrum of 11 .....                                                                                                    | 26 |
| Fig S51. HMBC spectrum of 11 .....                                                                                                    | 26 |
| Fig S52. ROESY spectrum of 11 .....                                                                                                   | 27 |
| Fig S53. UV spectrum of 11 .....                                                                                                      | 27 |
| Fig S54. HR-ESI-MS of 11 .....                                                                                                        | 28 |
| Fig S55. CD spectrum of 1 .....                                                                                                       | 28 |
| Table S1. The inhibitory effect of compounds <b>1-22</b> from <i>T. sinensis</i> on LPS induced NO production in RAW264.7 cells ..... | 29 |

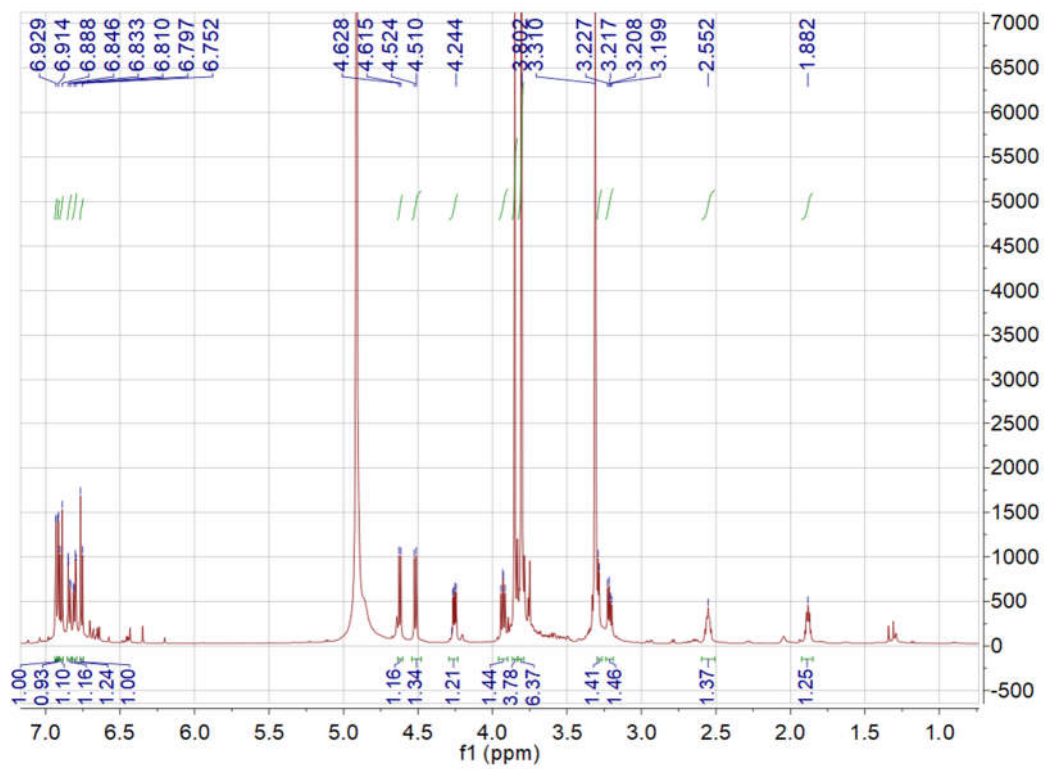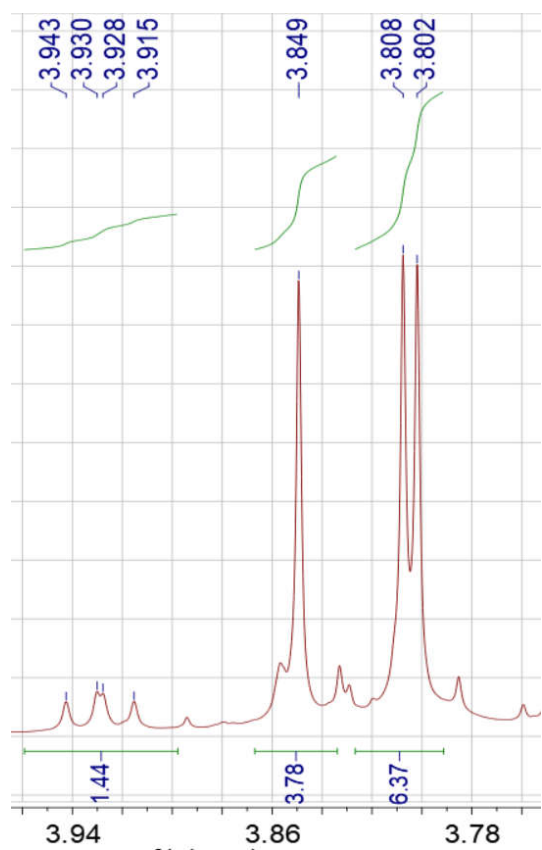

Fig S1. The  $^1\text{H}$ -NMR spectrum of **1**

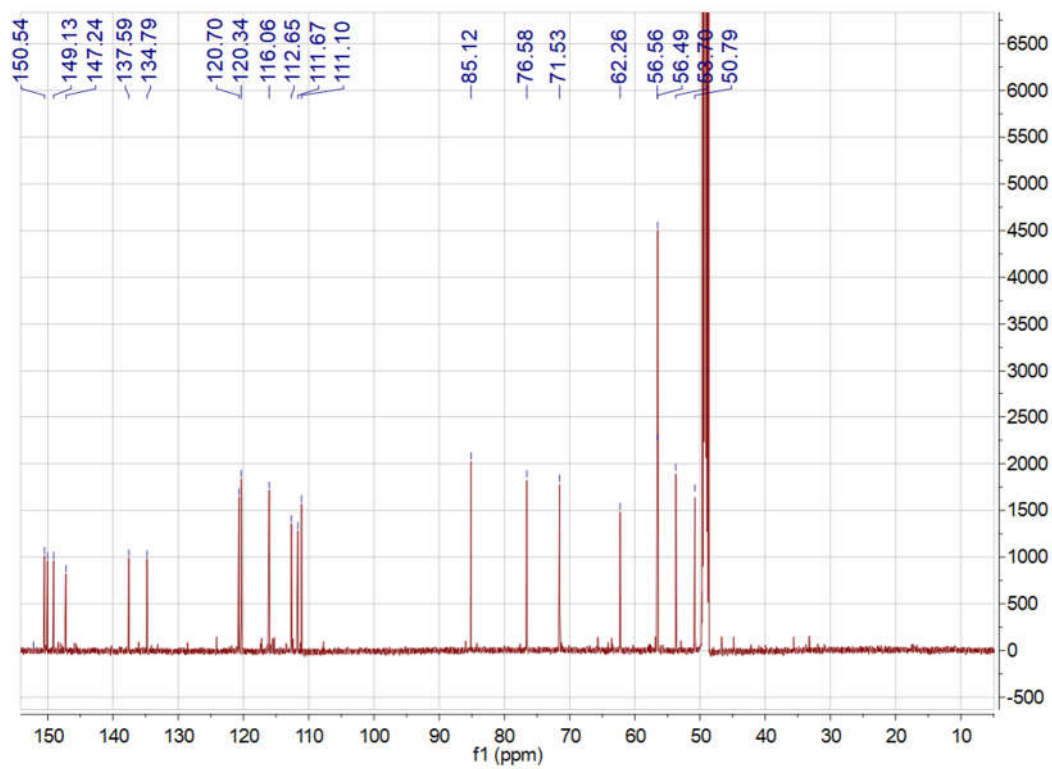

Fig S2. The  $^{13}\text{C}$ -NMR spectrum of 1

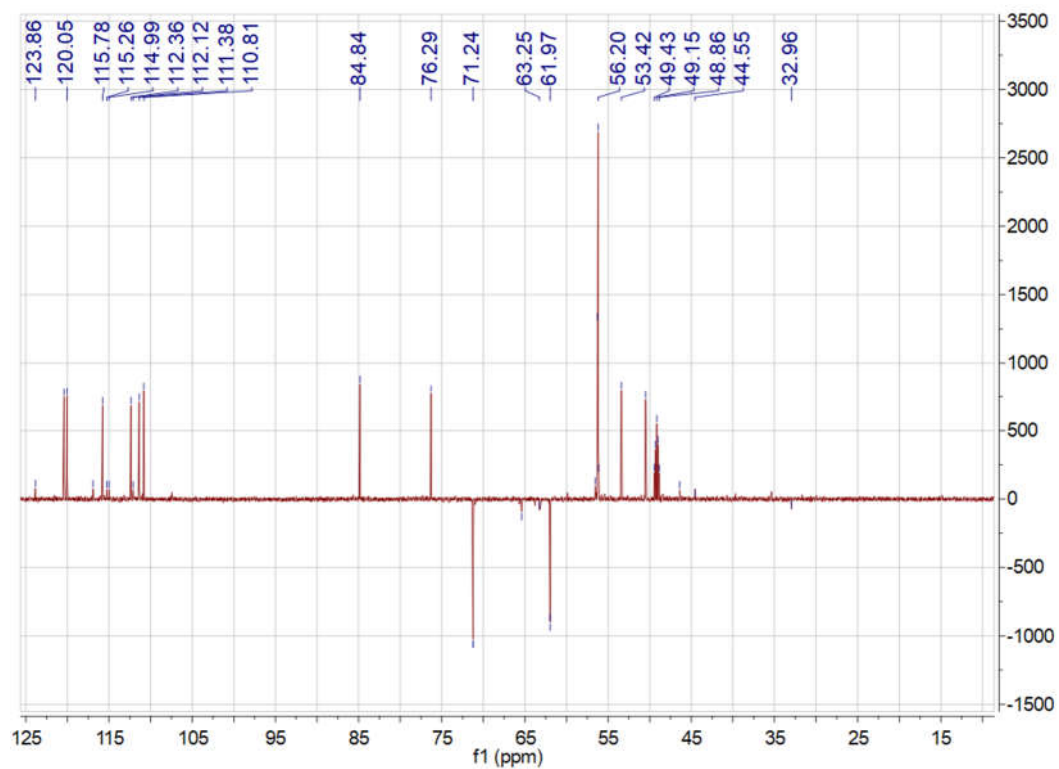

Fig S3.  $^{13}\text{C}$ -NMR-DEPT spectrum of 1

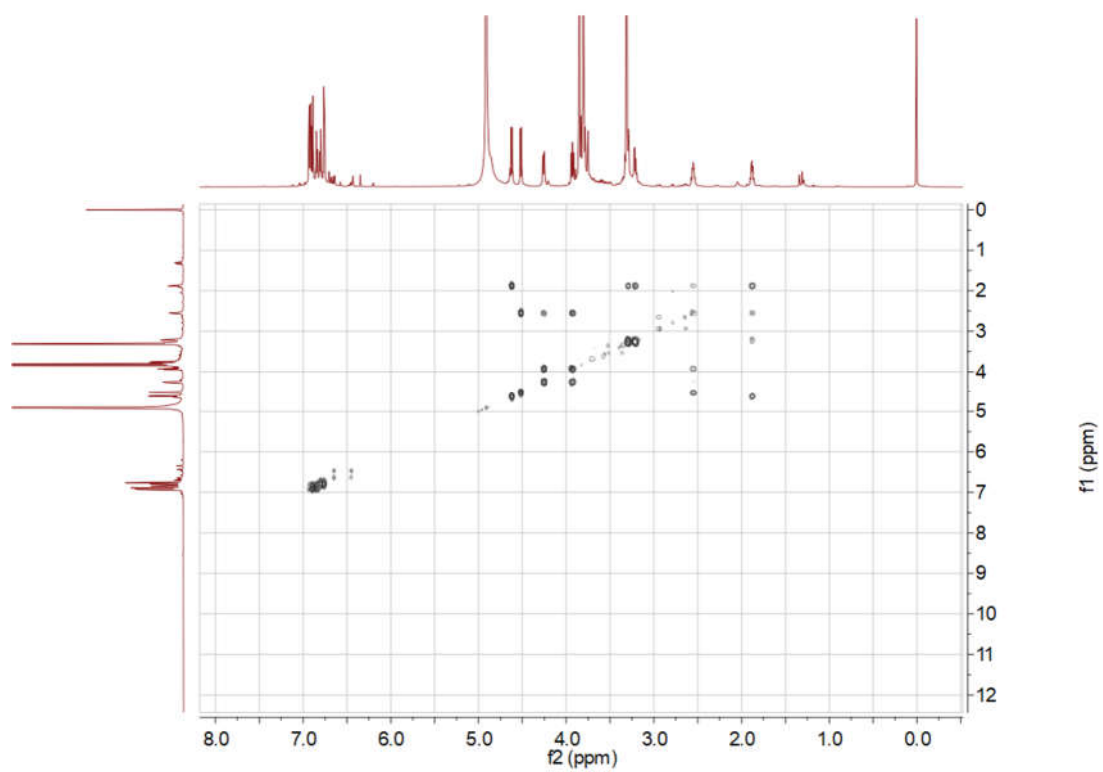

**Fig S4.  $^1\text{H}$ - $^1\text{H}$  COSY spectrum of 1**

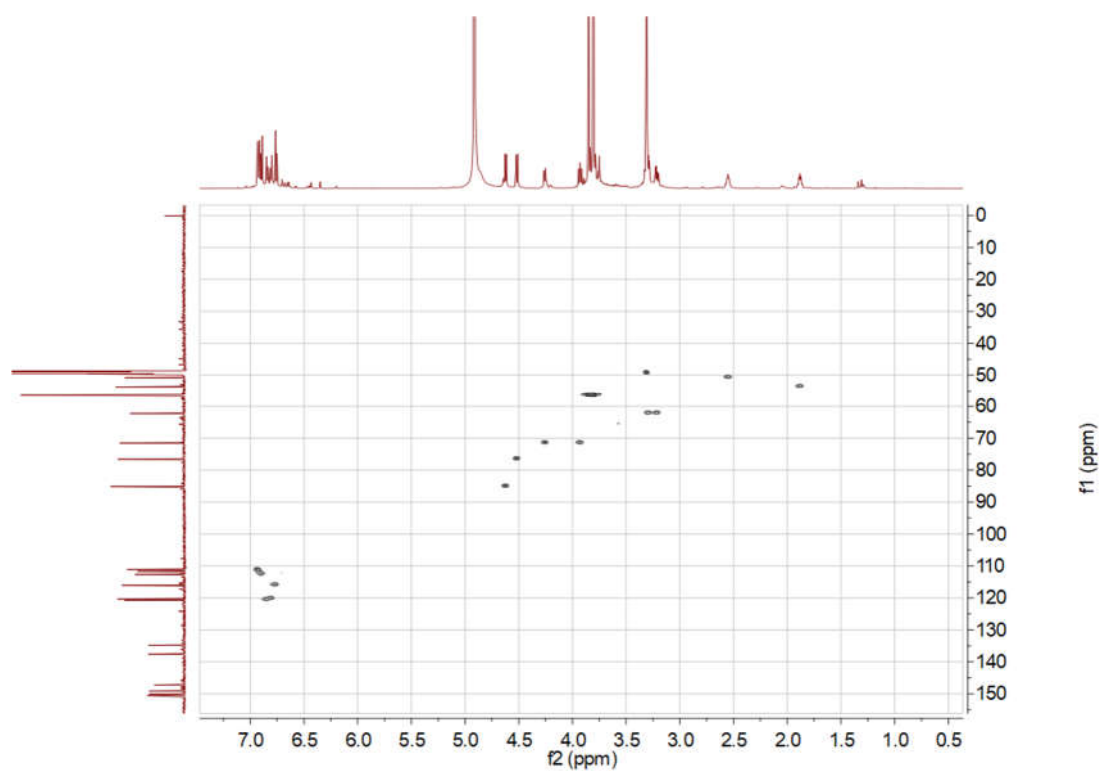

**Fig S5. HSQC spectrum of 1**

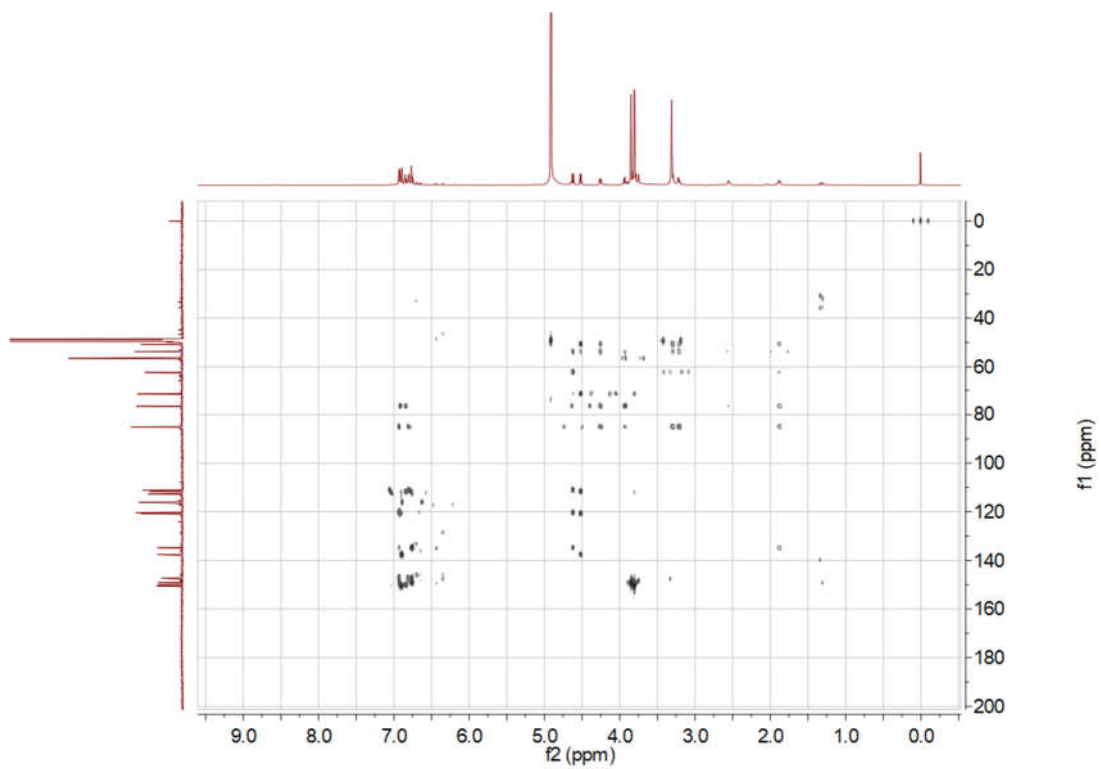

**Fig S6. HMBC spectrum of 1**

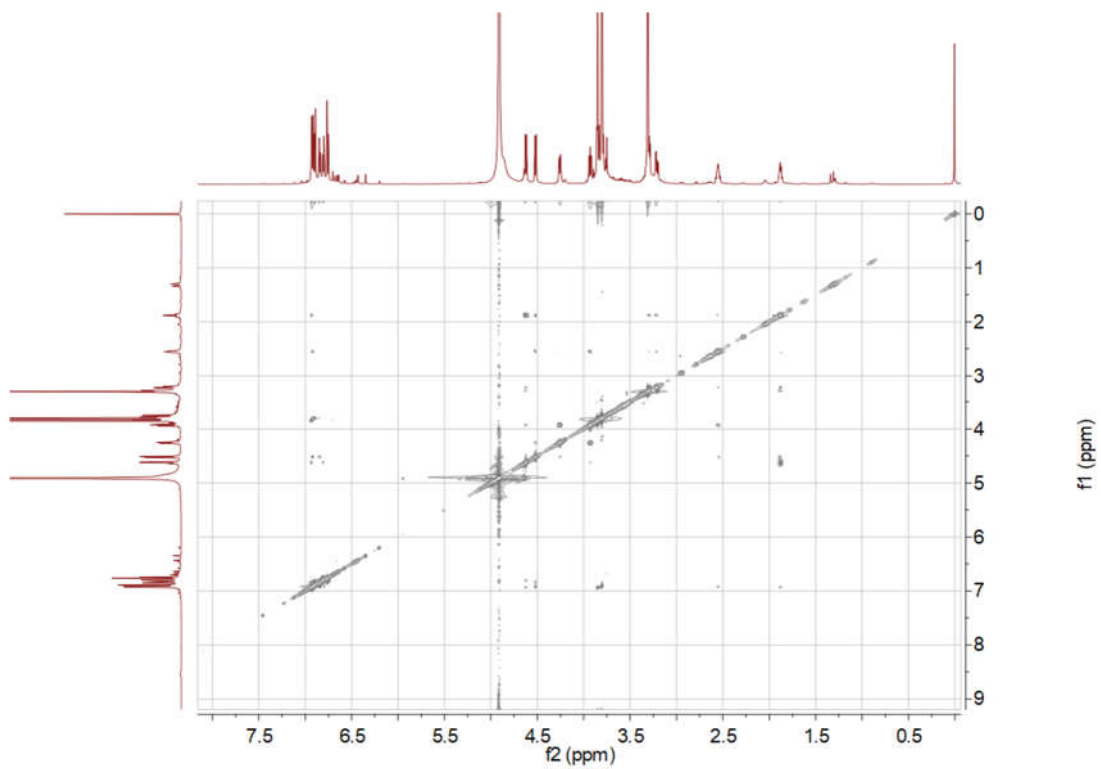

**Fig S7. ROESY spectrum of 1**

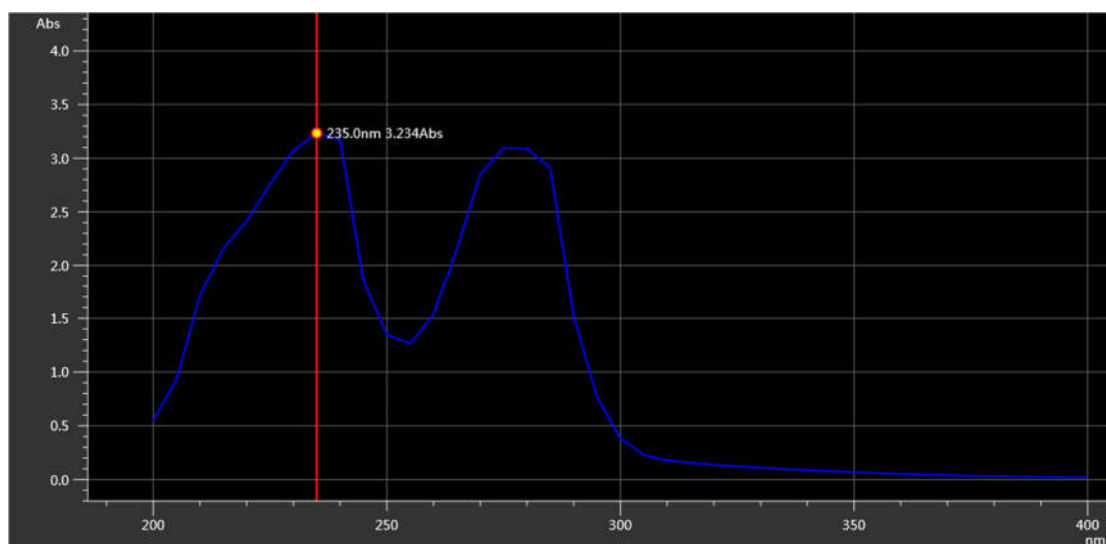

**Fig S8. UV spectrum of 1**

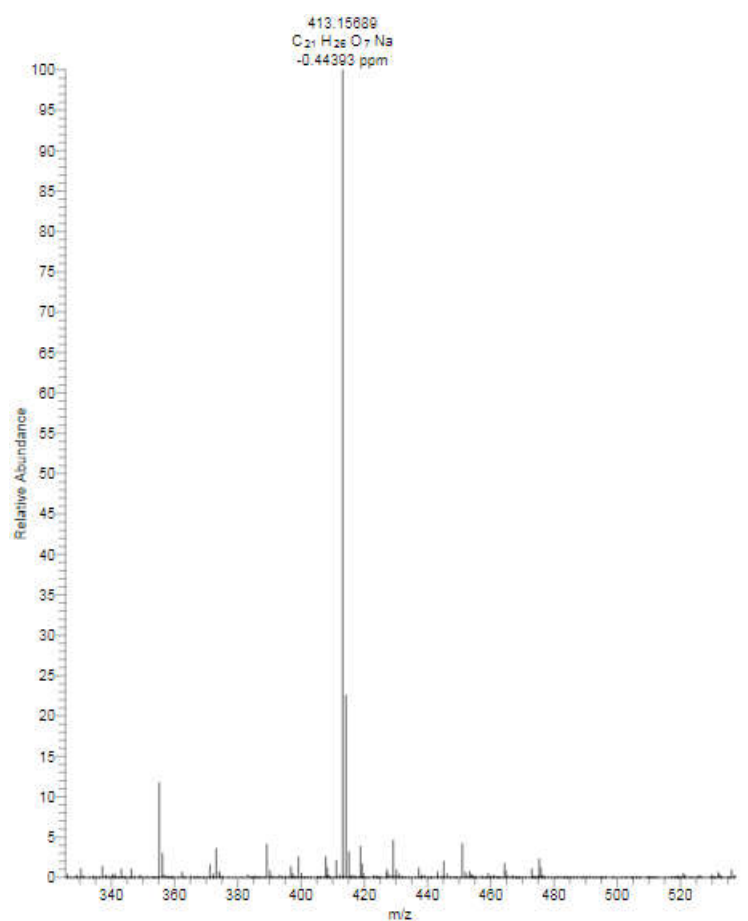

**Fig S9. HR-ESI-MS of 1**



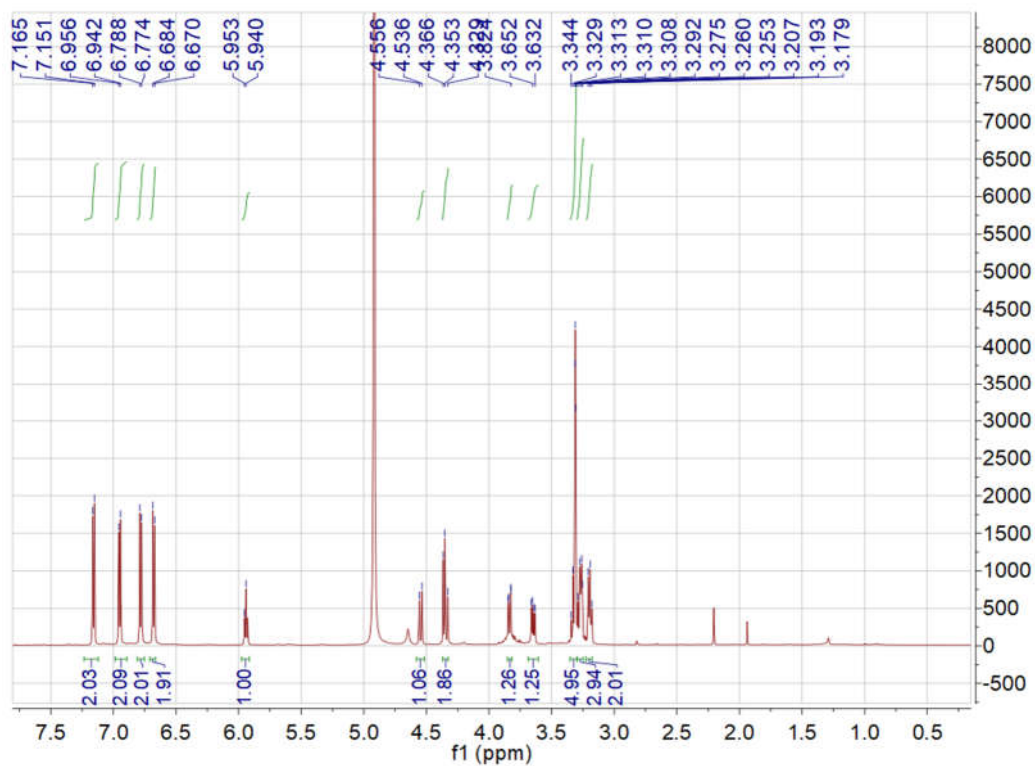

Fig S10. The  $^1\text{H}$ -NMR spectrum of 2

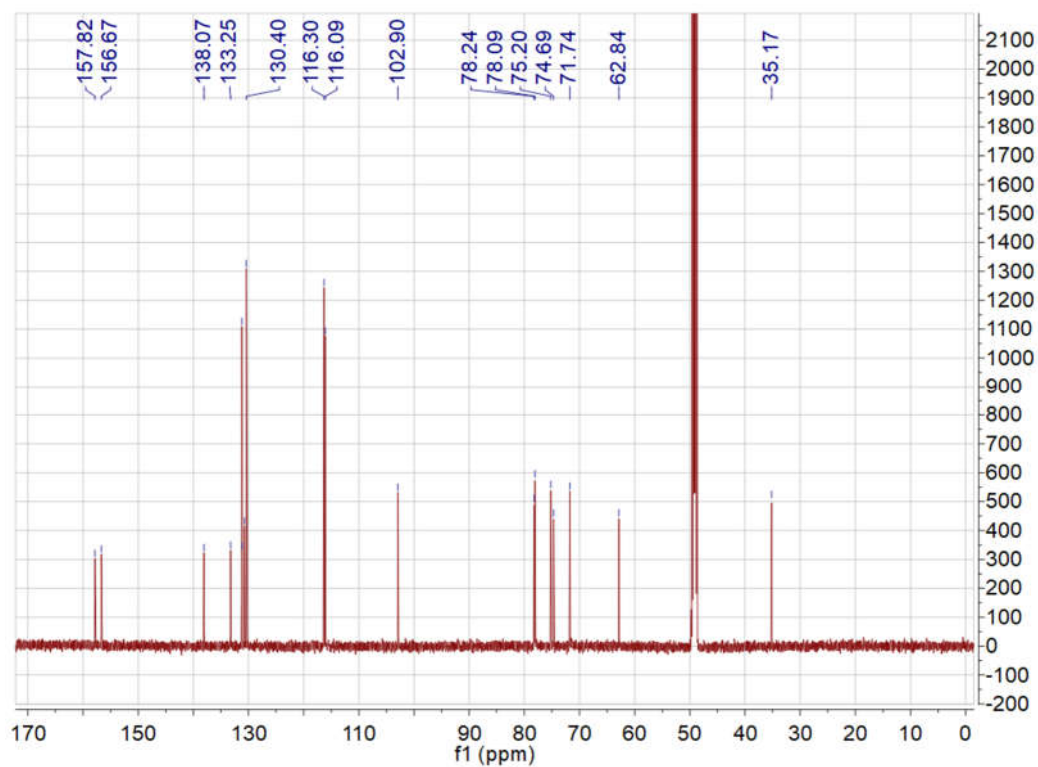

Fig S11. The  $^{13}\text{C}$ -NMR spectrum of 2

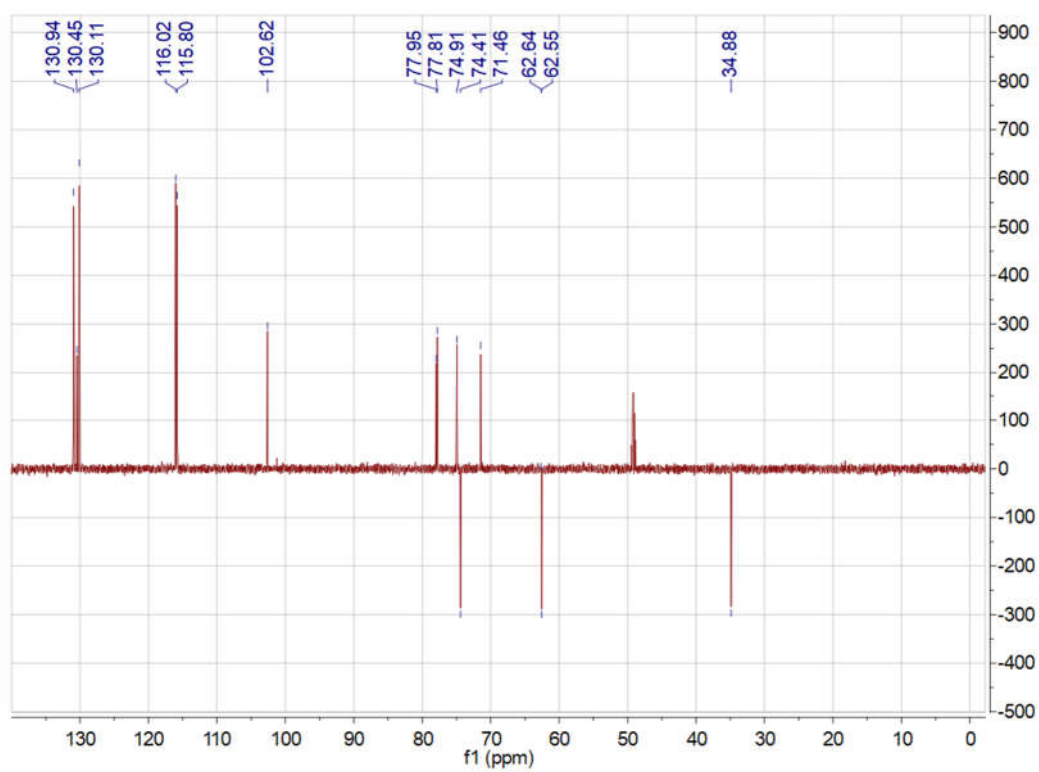

**Fig S12.**  $^{13}\text{C}$ -NMR-DEPT spectrum of **2**

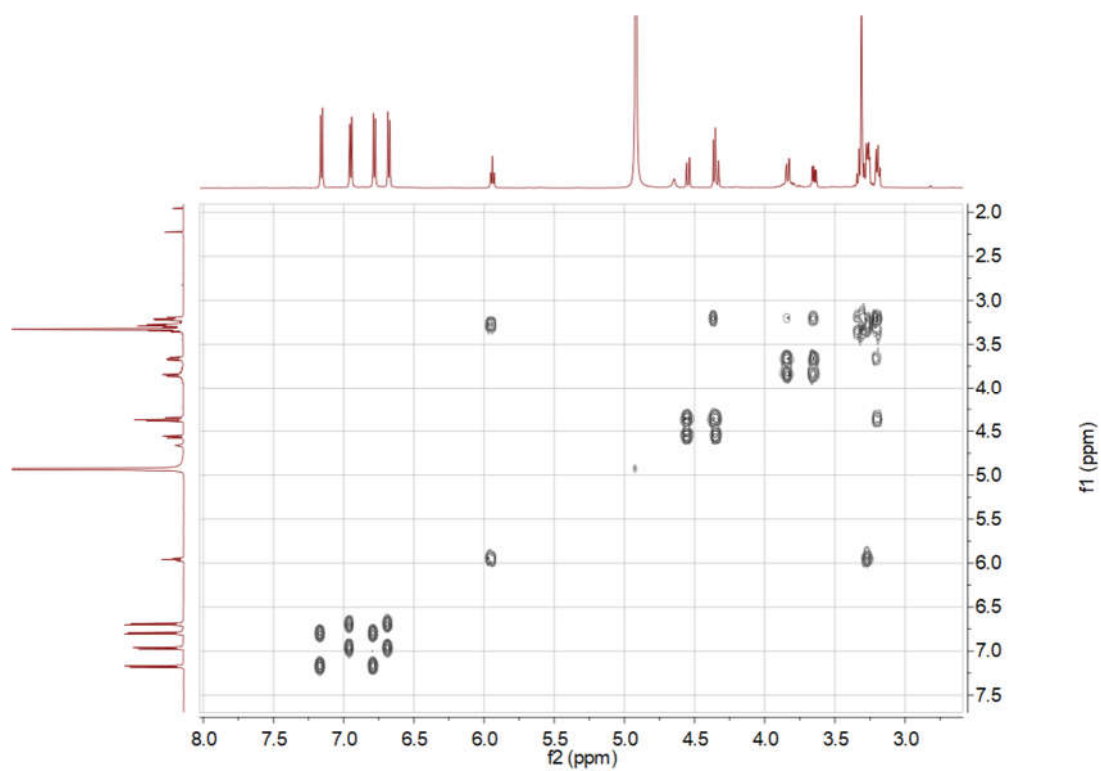

**Fig S13.**  $^1\text{H}$ - $^1\text{H}$  COSY spectrum of **2**

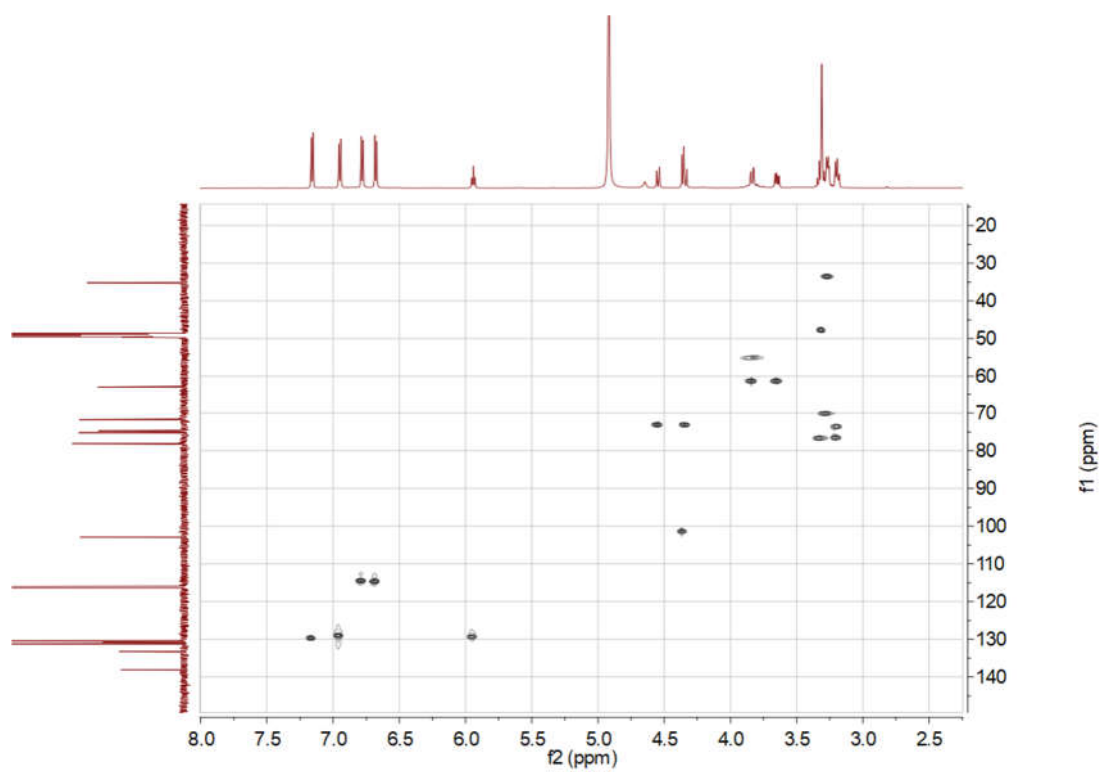

**Fig S14. HSQC spectrum of 2**

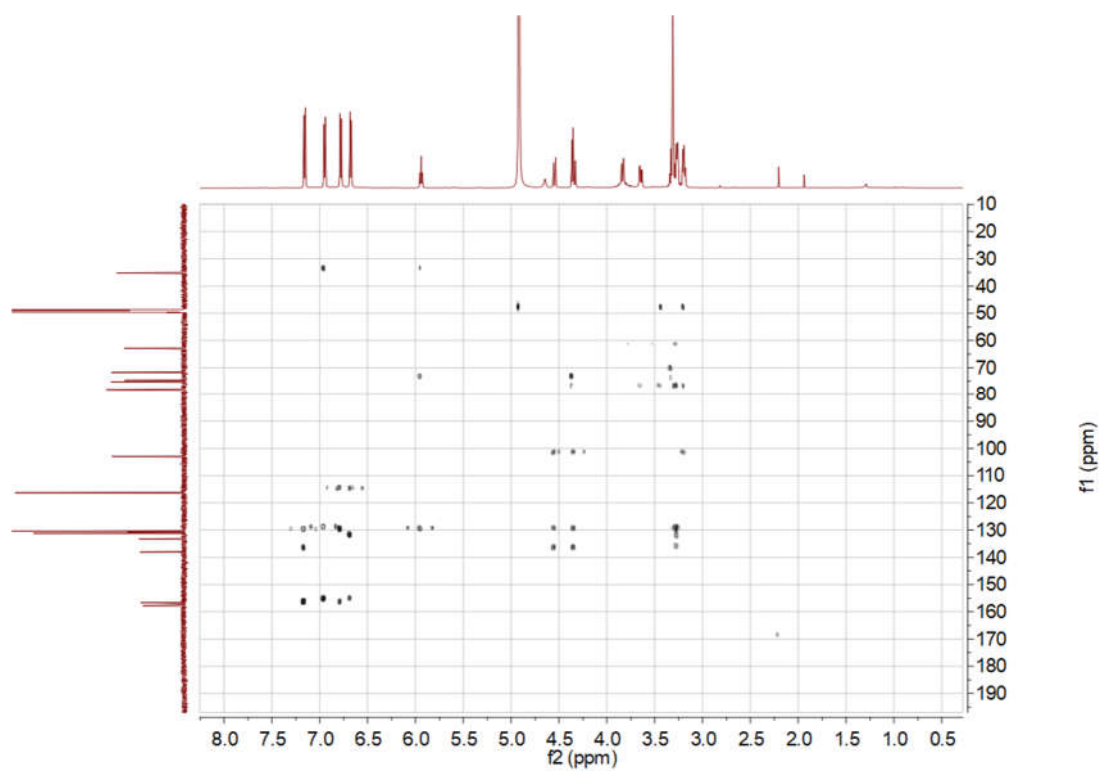

**Fig S15. HMBC spectrum of 2**

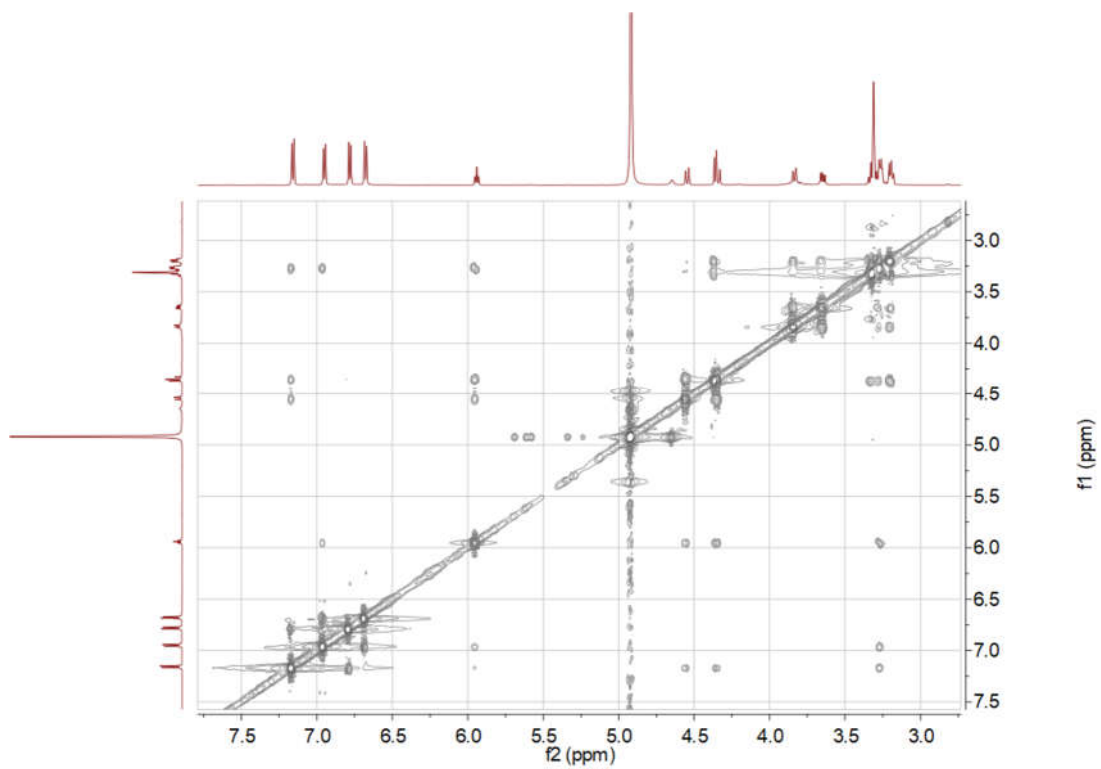

**Fig S16. ROESY spectrum of 2**

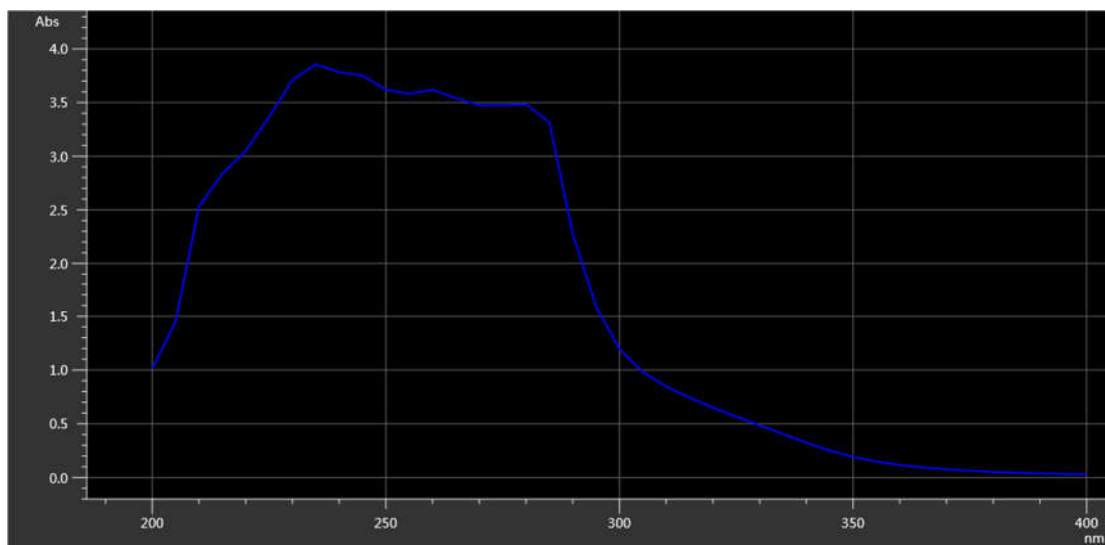

**Fig S17. UV spectrum of 2**

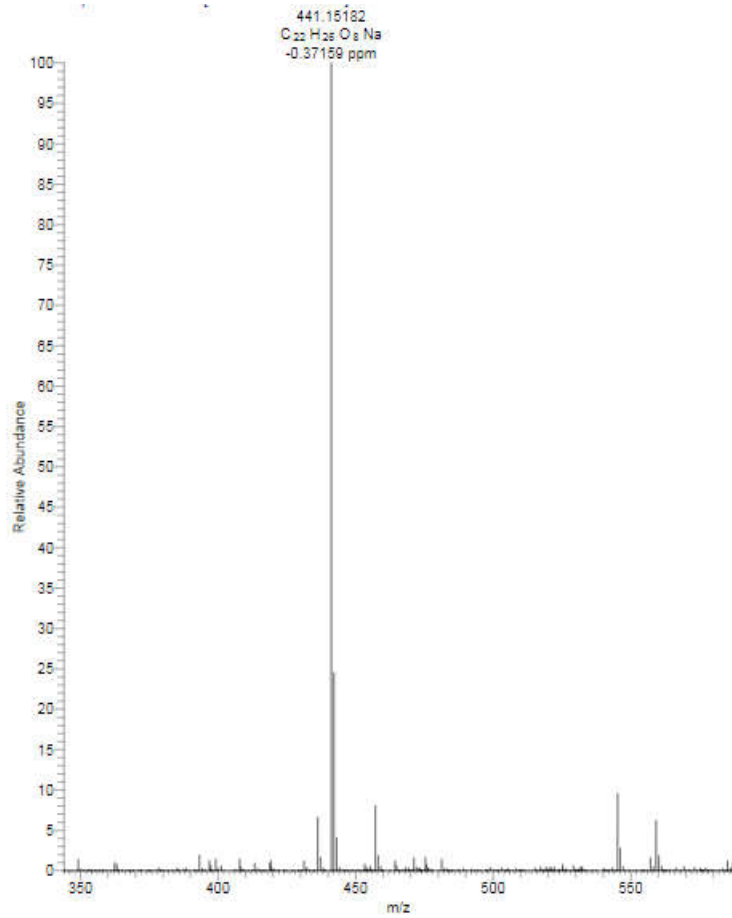

**Fig S18. HR-ESI-MS of 2**

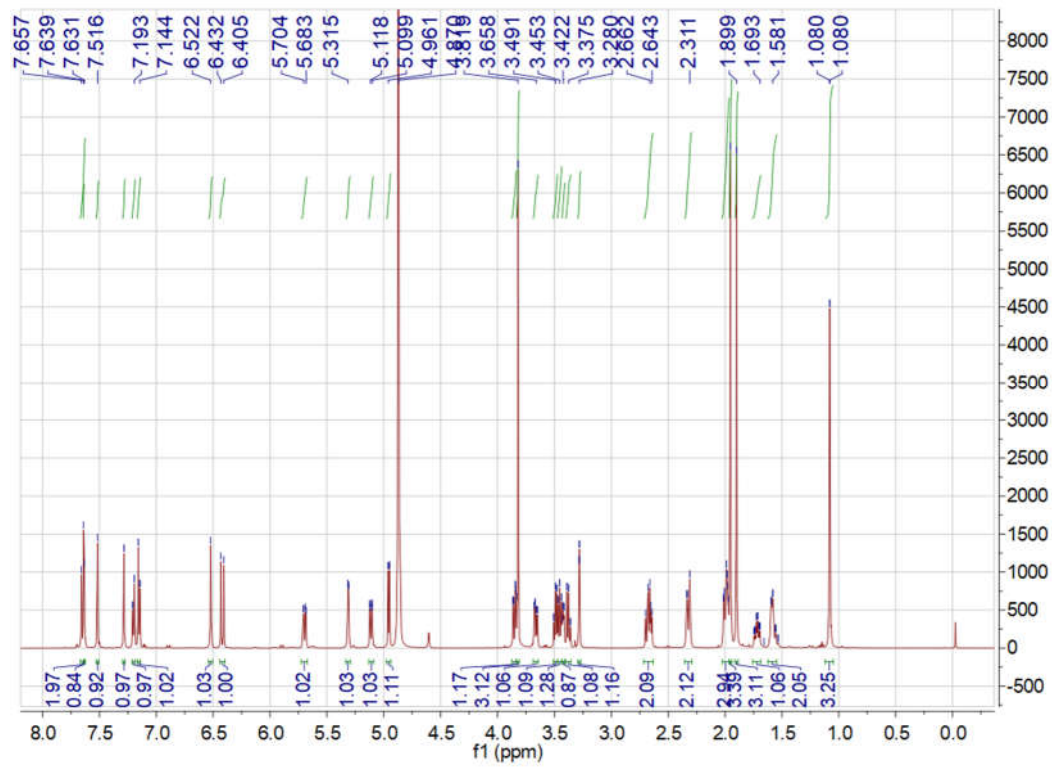

**Fig S19. The <sup>1</sup>H-NMR spectrum of 3**

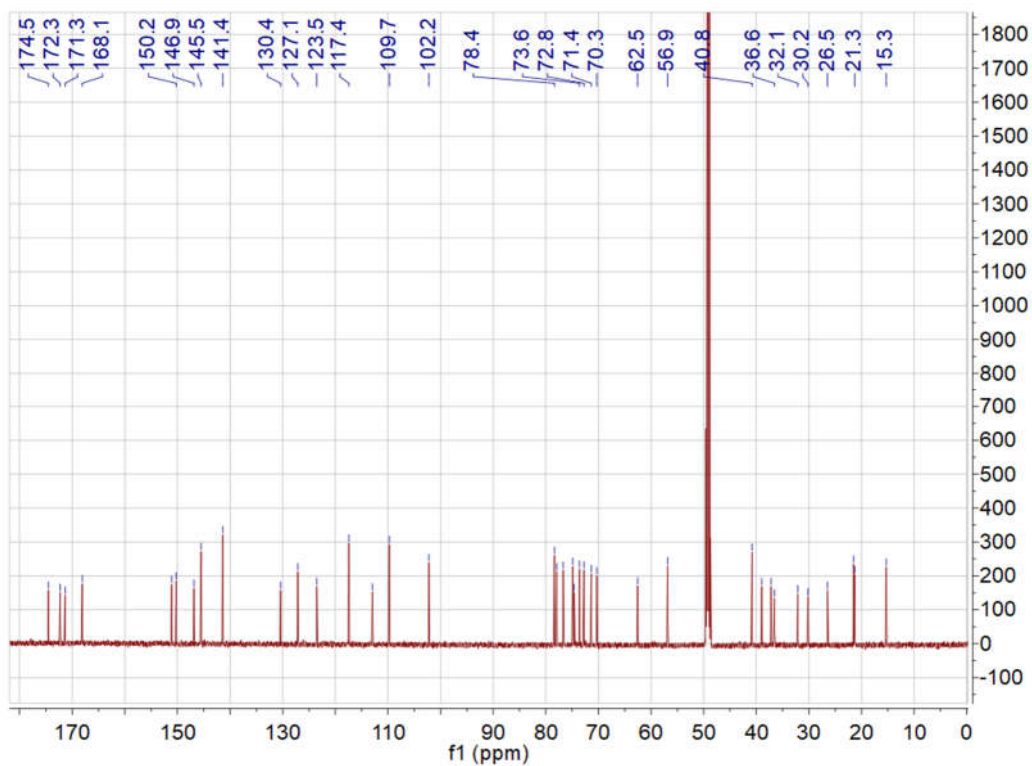

Fig S20. The  $^{13}\text{C}$ -NMR spectrum of **3**

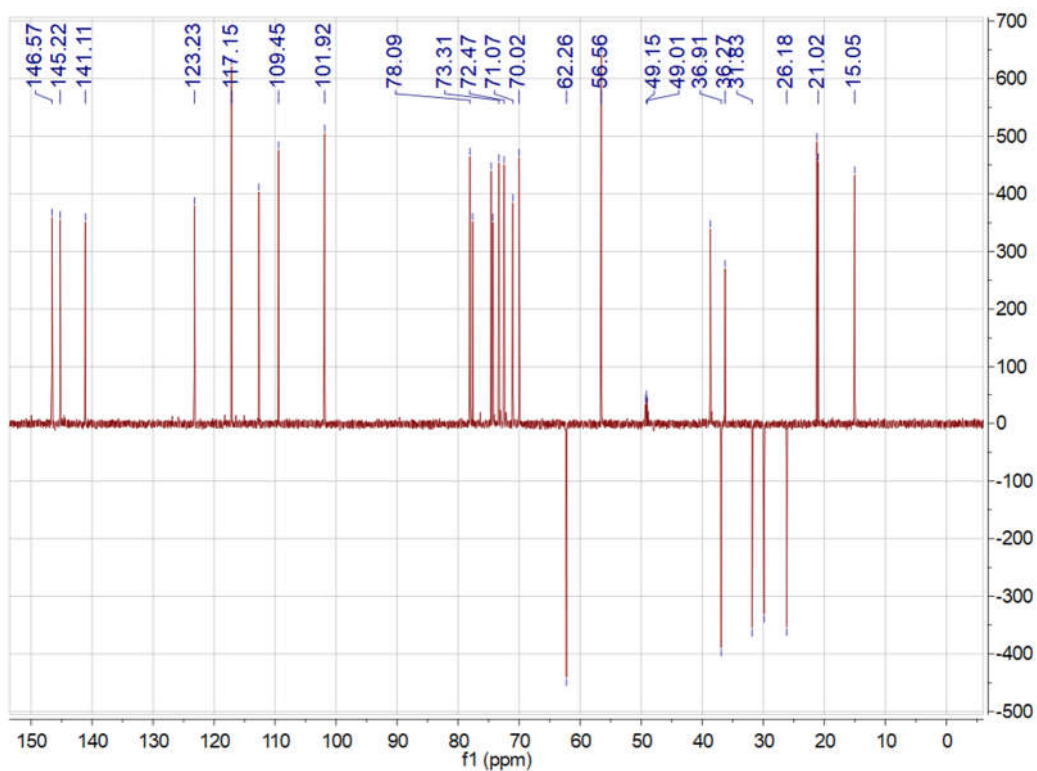

Fig S21.  $^{13}\text{C}$ -NMR-DEPT spectrum of **3**

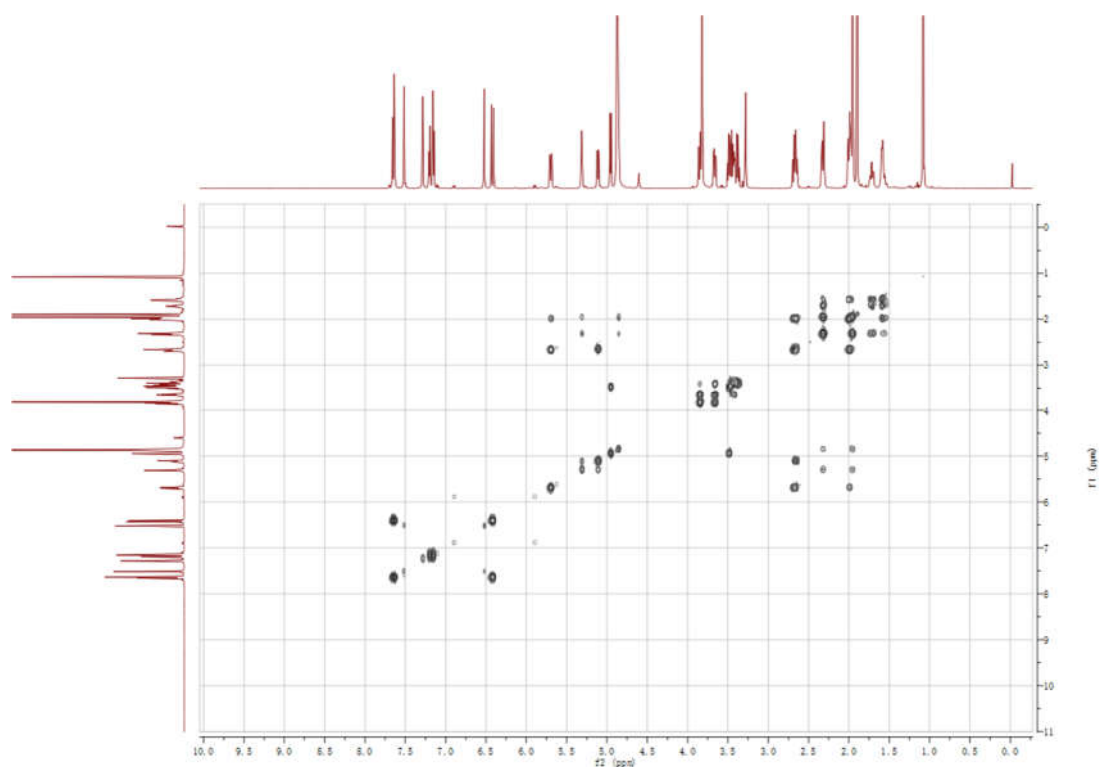

**Fig S22.**  $^1\text{H}$ - $^1\text{H}$  COSY spectrum of **3**

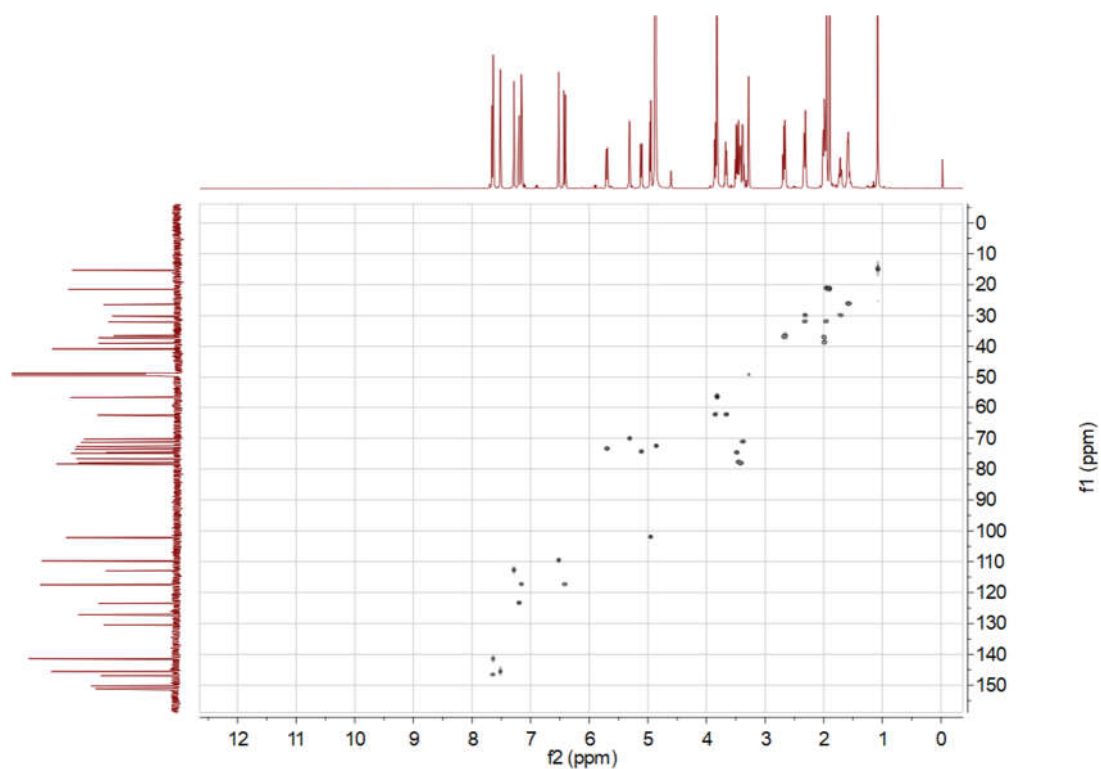

**Fig S23.** HSQC spectrum of **3**

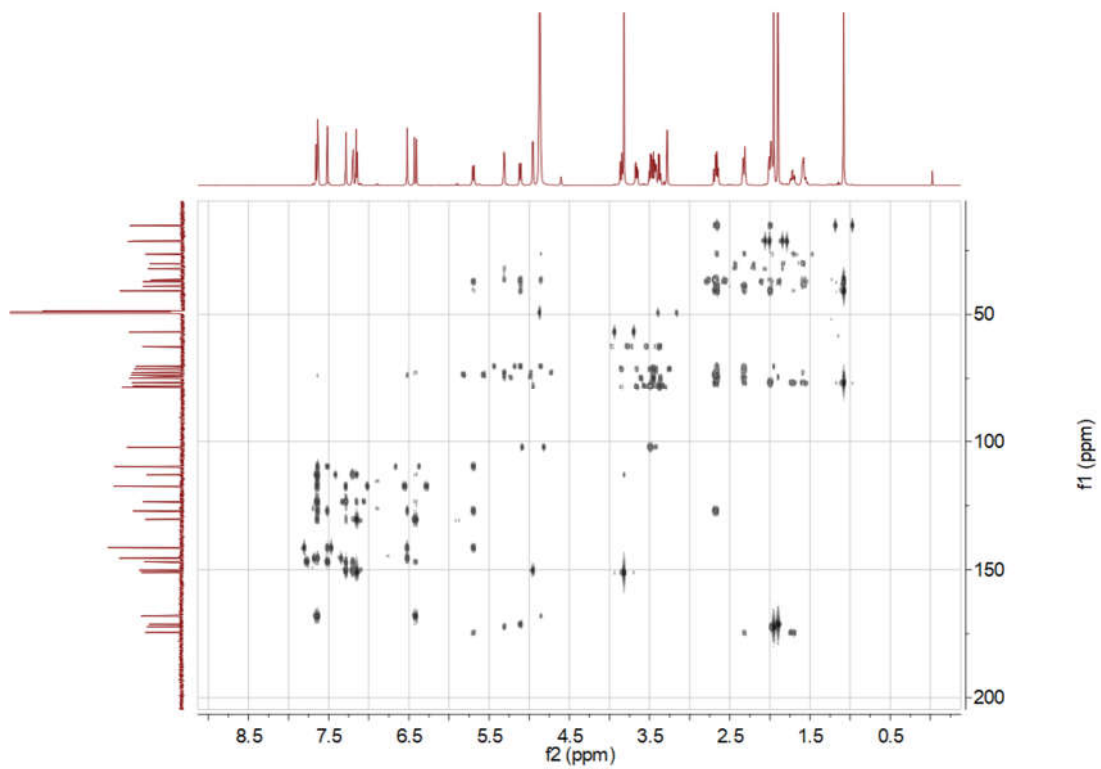

**Fig S24. HMBC spectrum of 3**

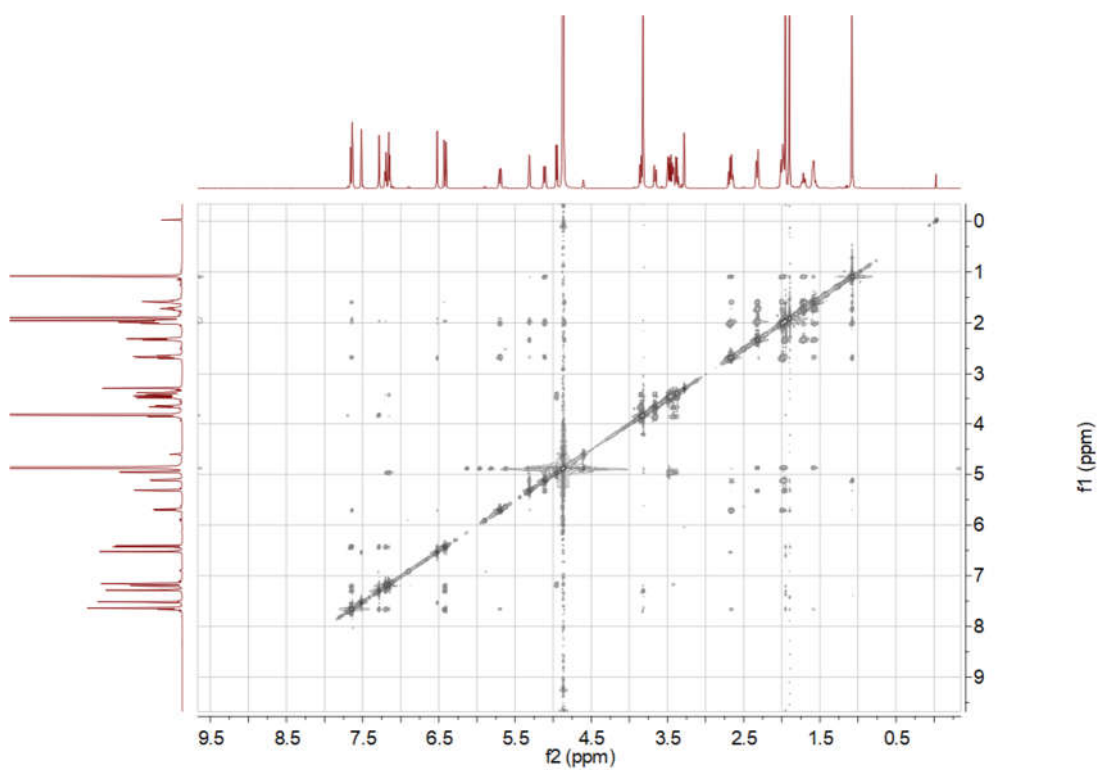

**Fig S25. ROESY spectrum of 3**



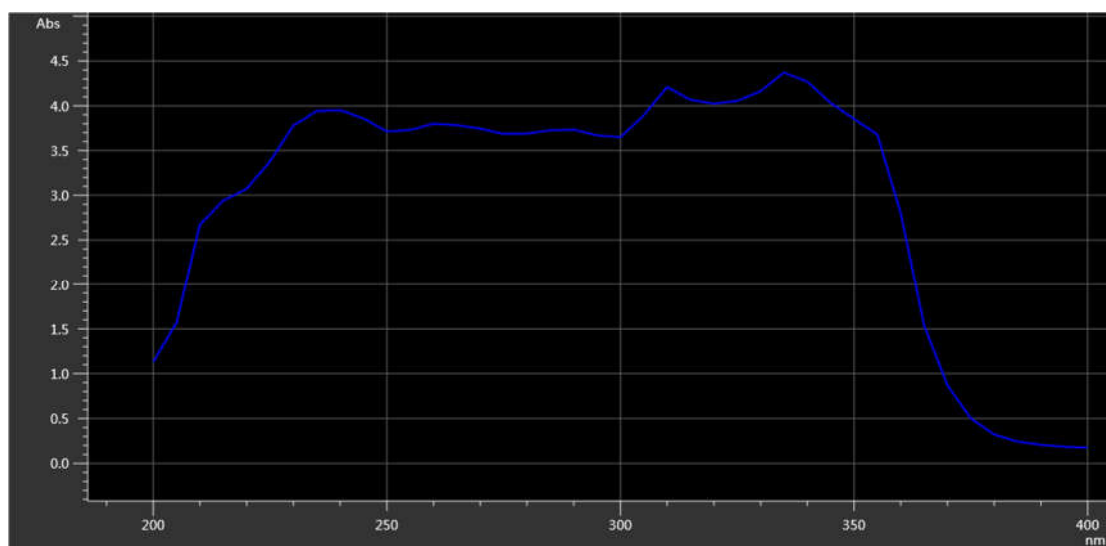

**Fig S26. UV spectrum of 3**

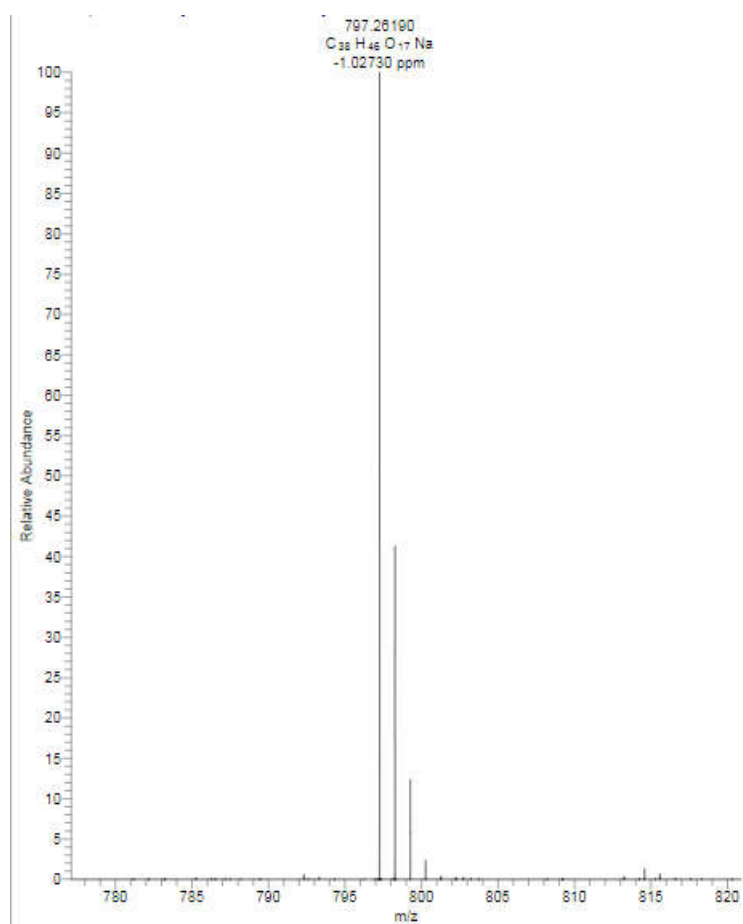

**Fig S27. HR-ESI-MS of 3**

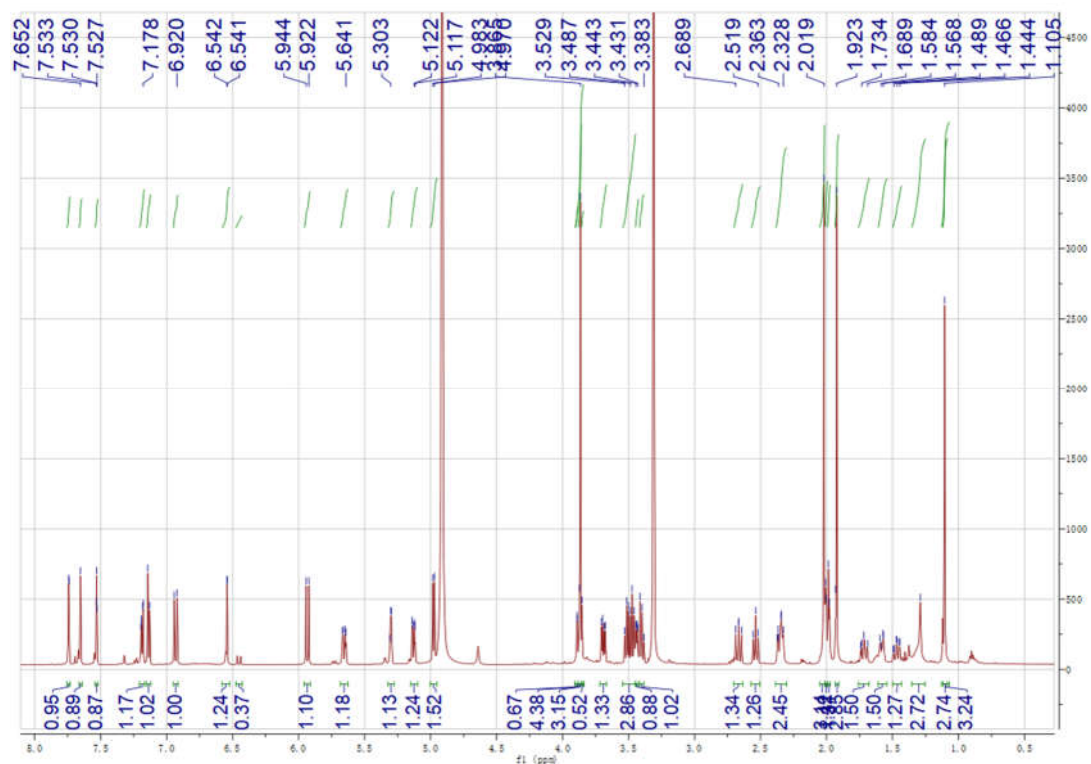

Fig S28. The  $^1\text{H}$ -NMR spectrum of 4

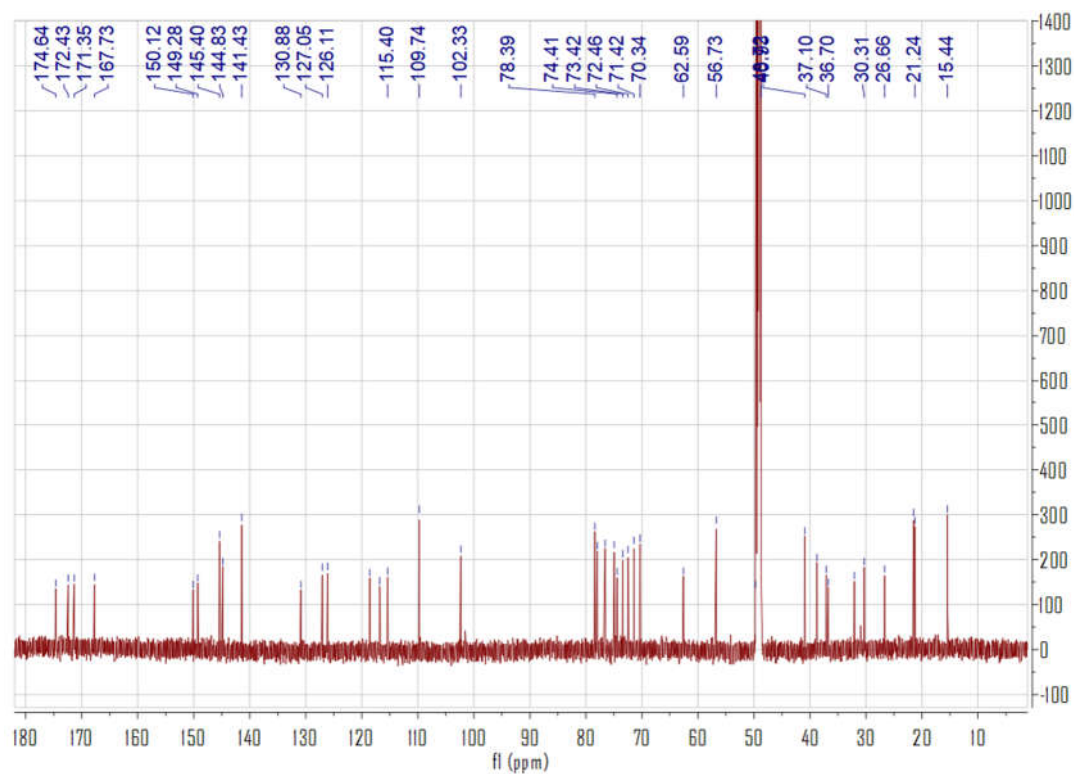

Fig S29. The  $^{13}\text{C}$ -NMR spectrum of 4

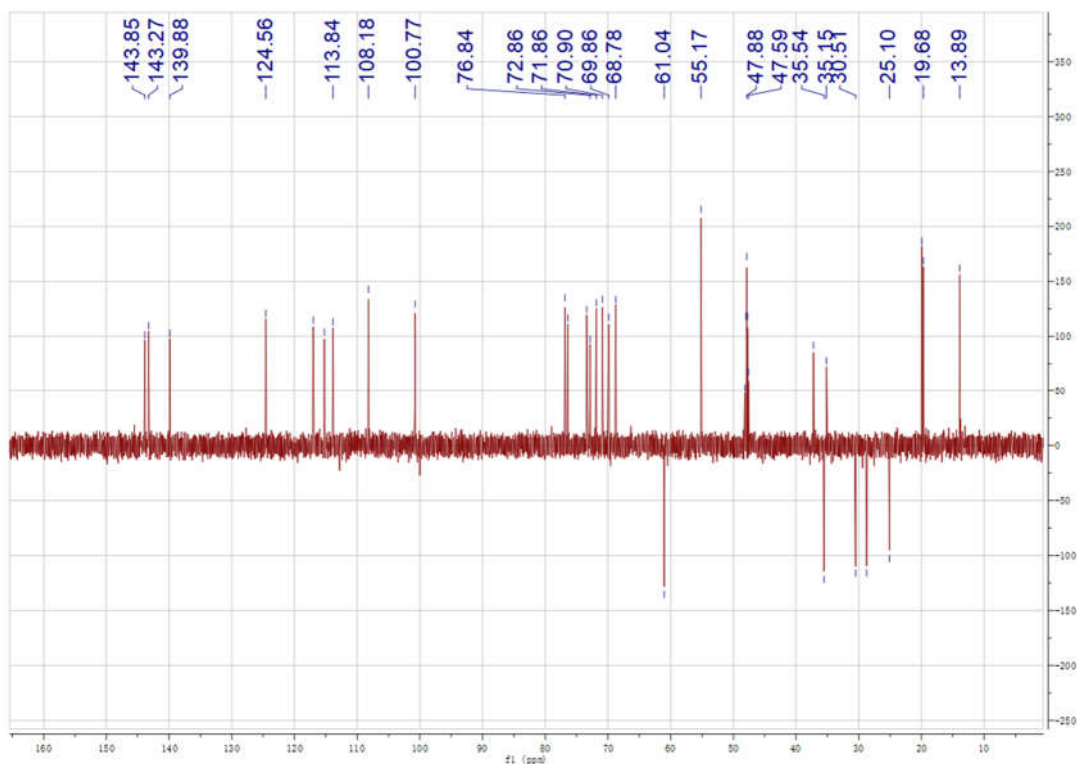

Fig S30.  $^{13}\text{C}$ -NMR-DEPT spectrum of 4

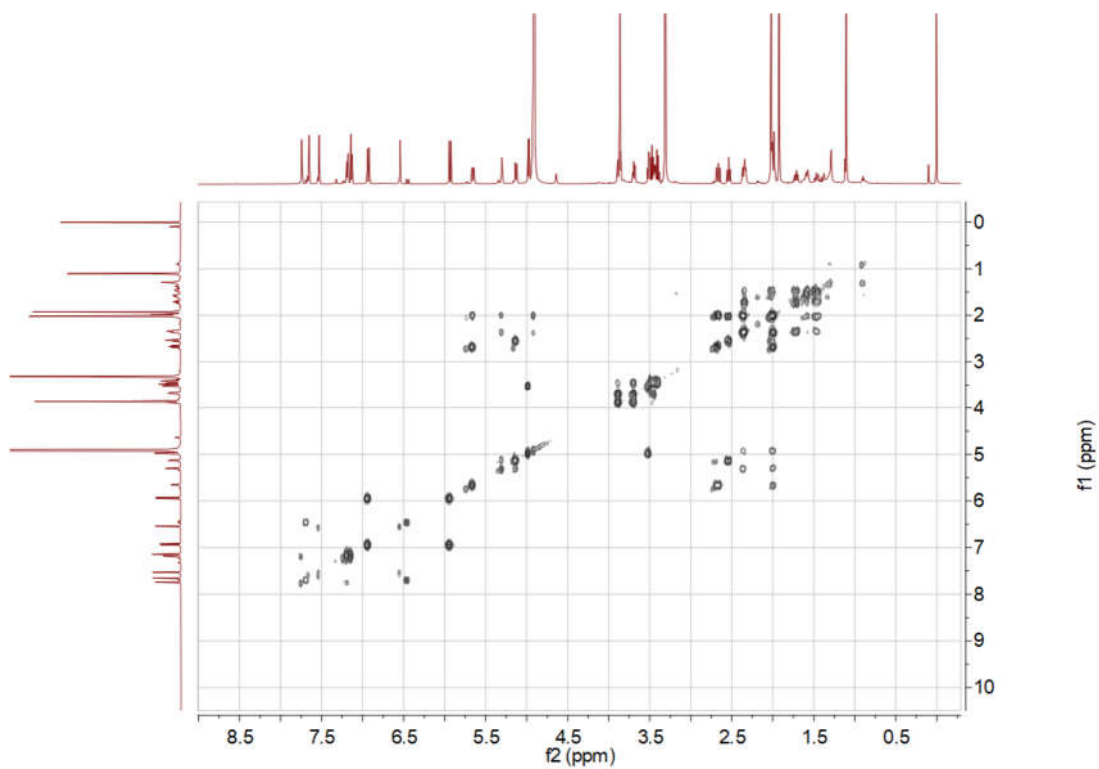

Fig S31.  $^1\text{H}$ - $^1\text{H}$  COSY spectrum of 4

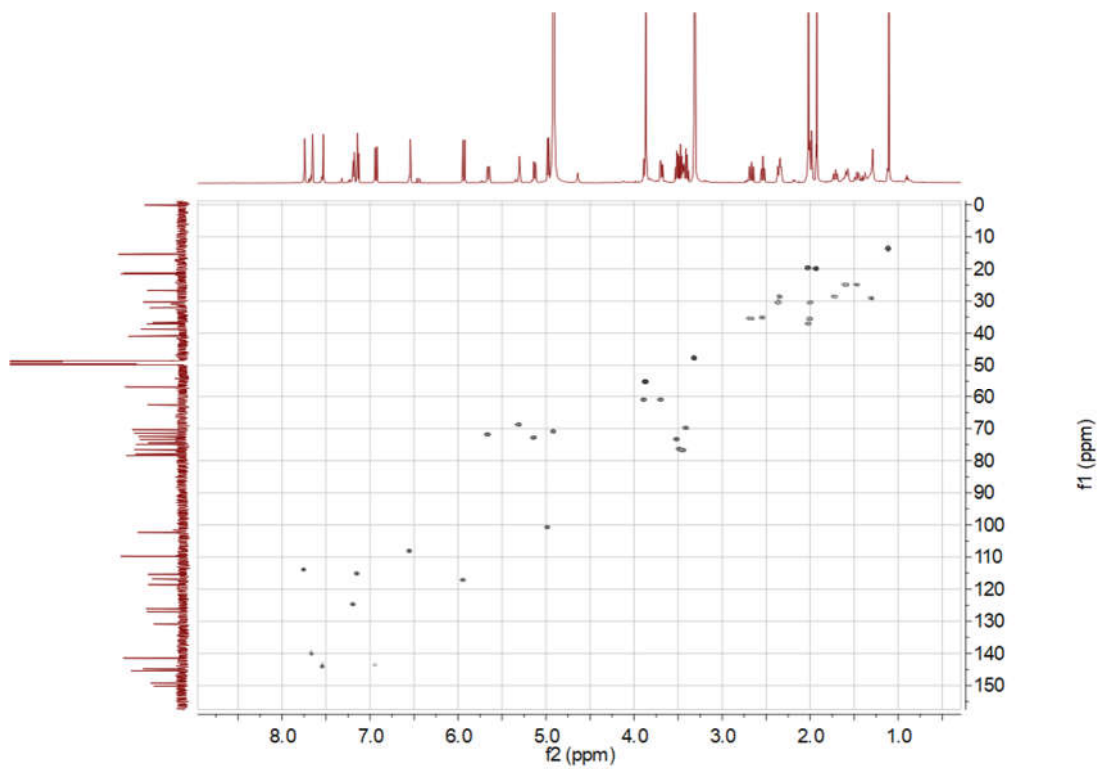

**Fig S32. HSQC spectrum of 4**

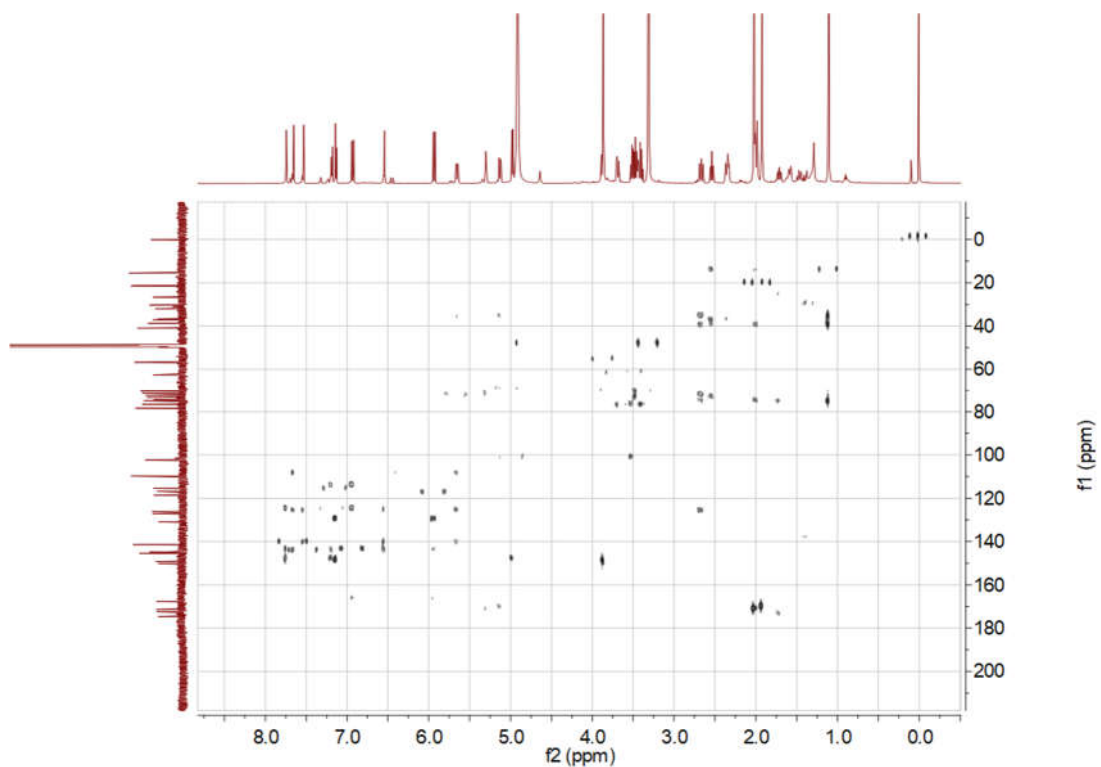

**Fig S33. HMBC spectrum of 4**

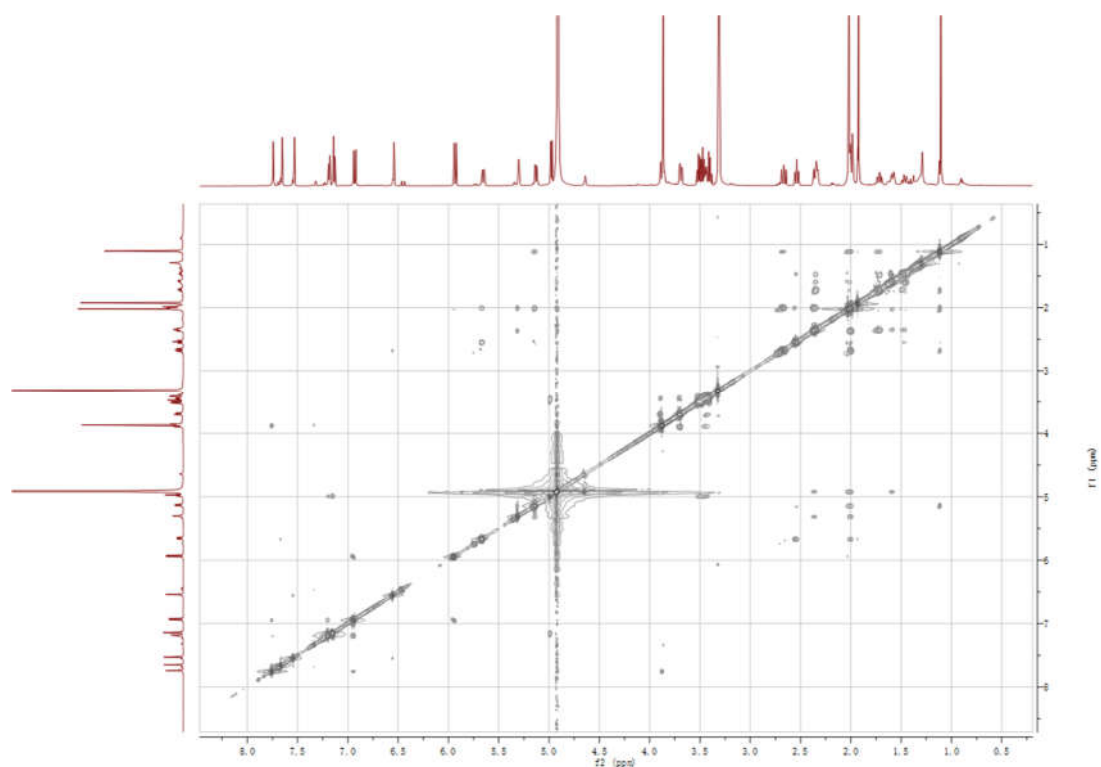

**Fig S34. ROESY spectrum of 4**

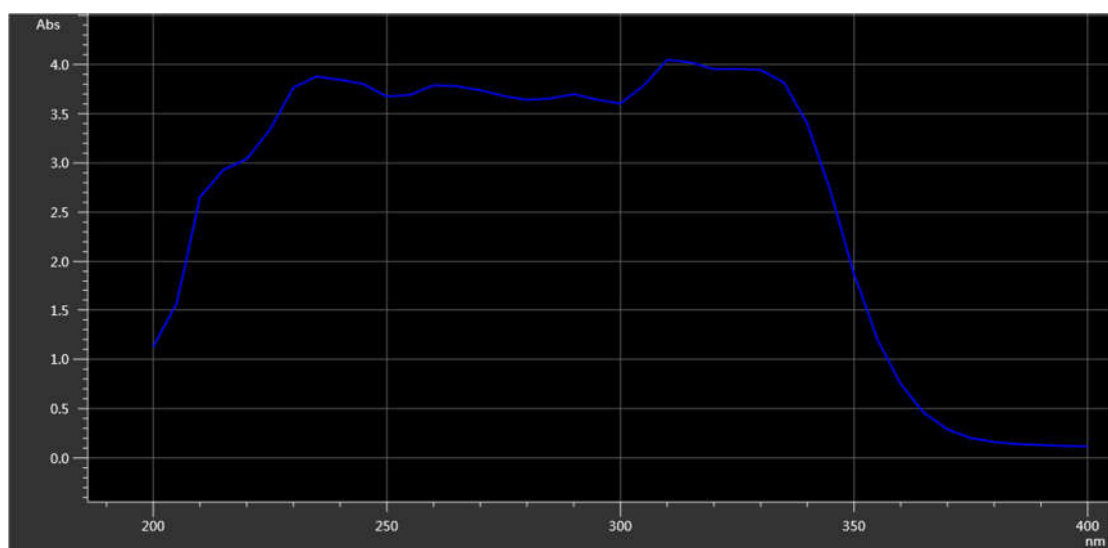

**Fig S35. UV spectrum of 4**

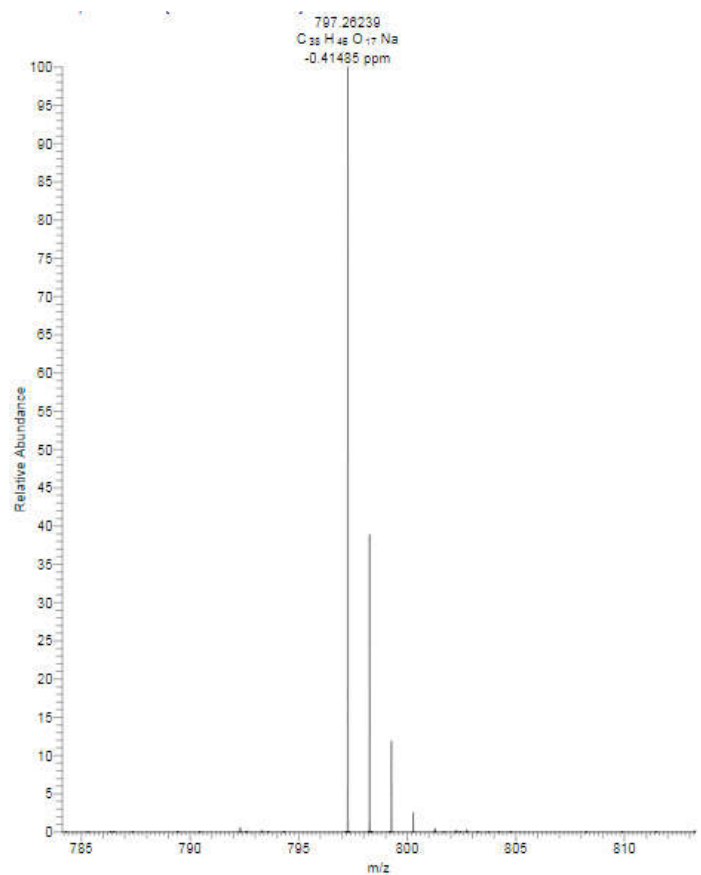

Fig S36. HR-ESI-MS of 4

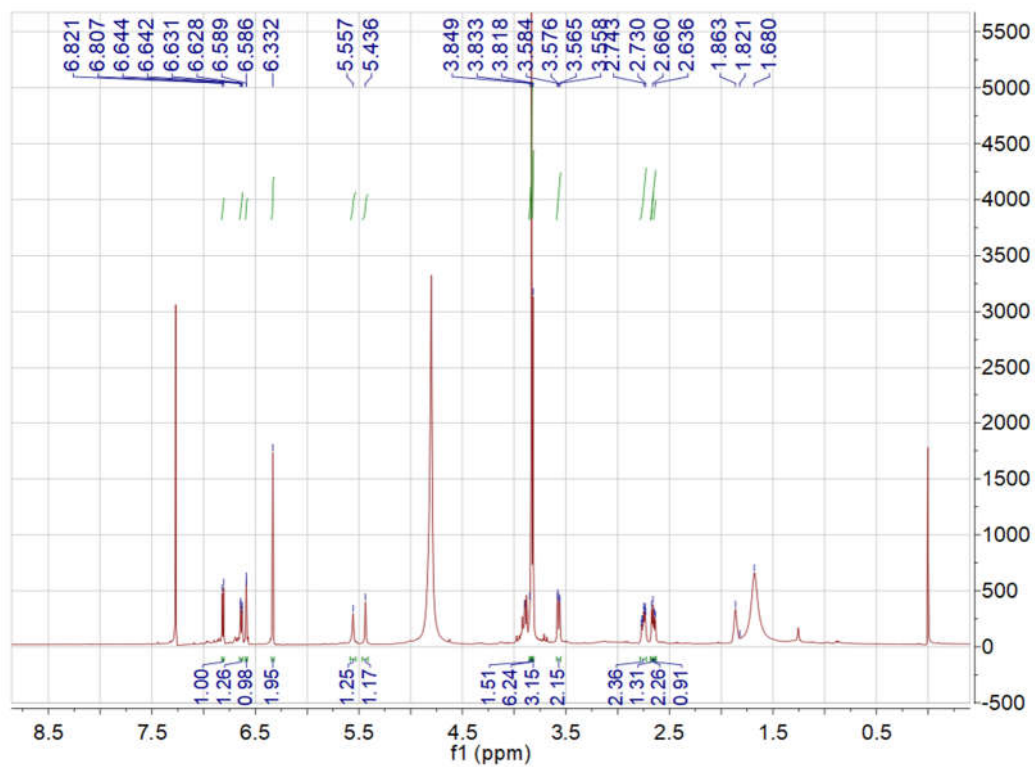

Fig S37. The <sup>1</sup>H-NMR spectrum of 9

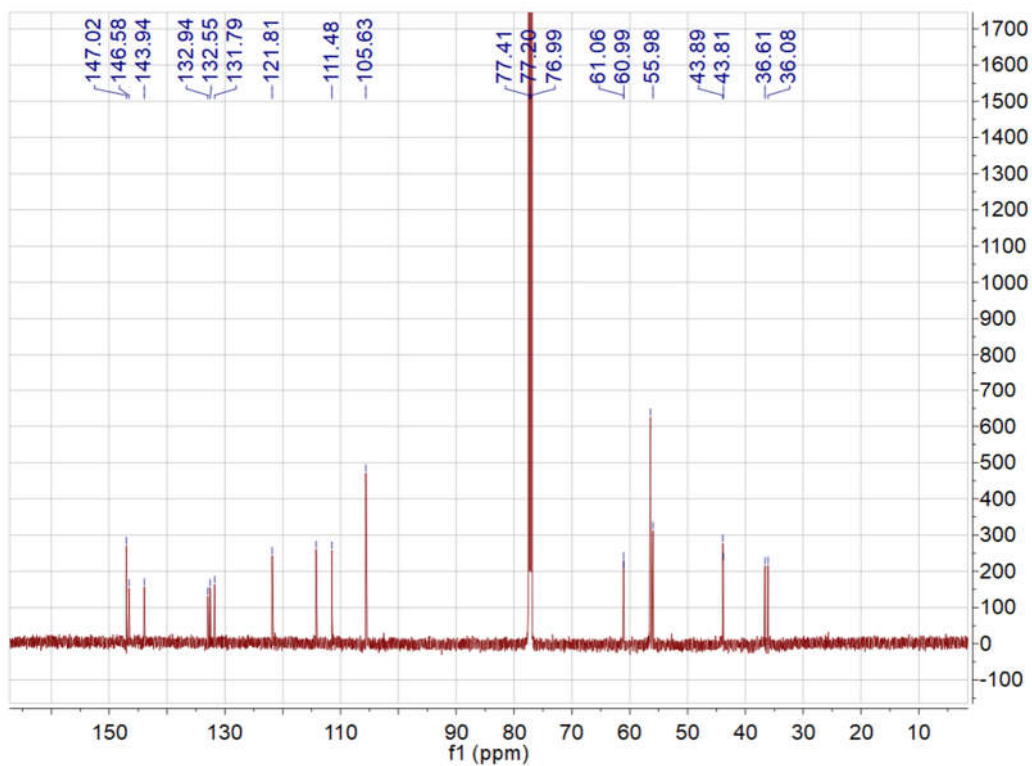

Fig S38. The  $^{13}\text{C}$ -NMR spectrum of 9

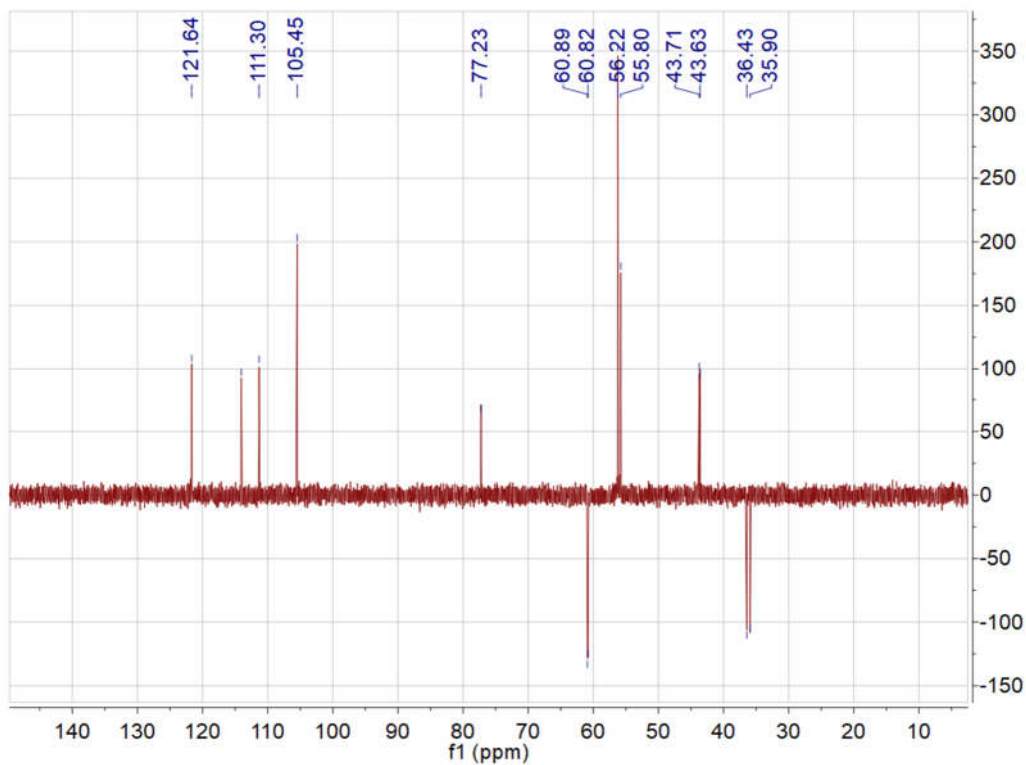

Fig S39.  $^{13}\text{C}$ -NMR-DEPT spectrum of 9

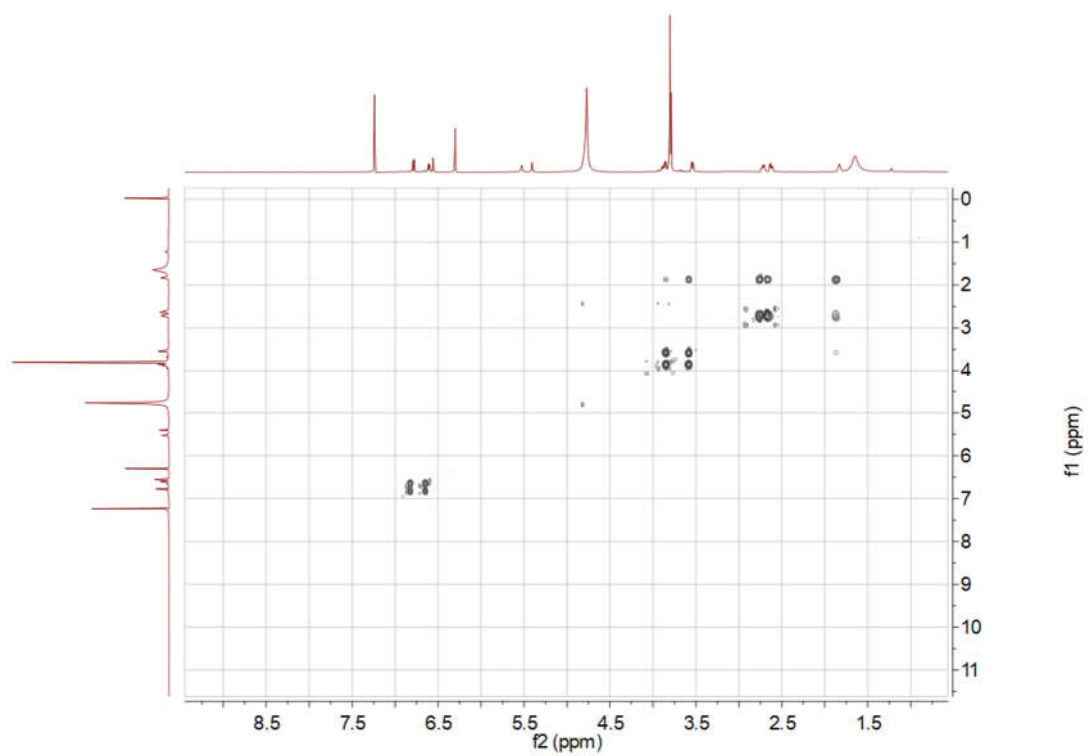

**Fig S40.**  $^1\text{H}$ - $^1\text{H}$  COSY spectrum of **9**

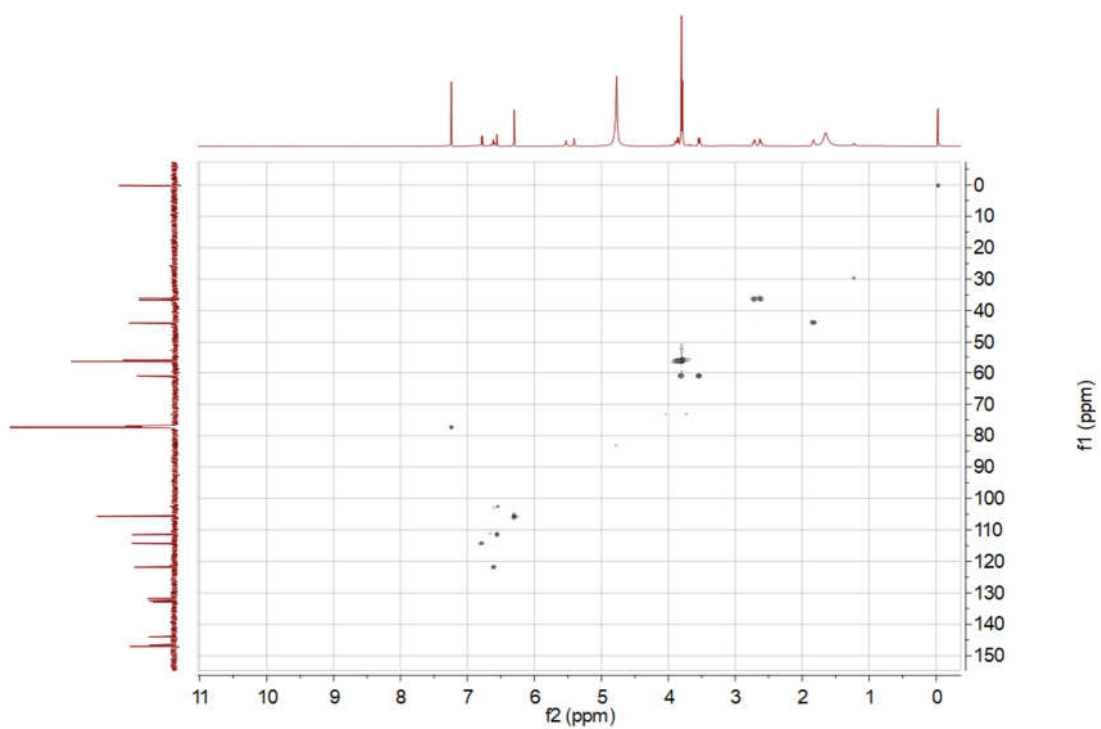

**Fig S41.** HSQC spectrum of **9**



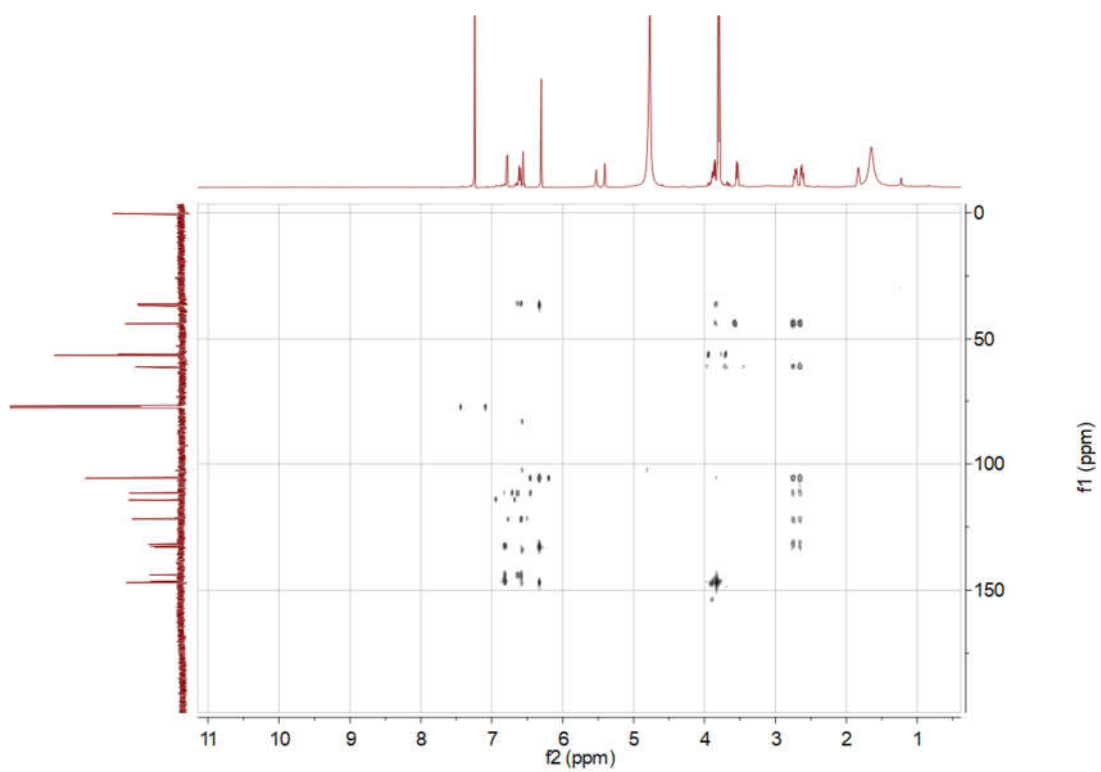

**Fig S42. HMBC spectrum of 9**

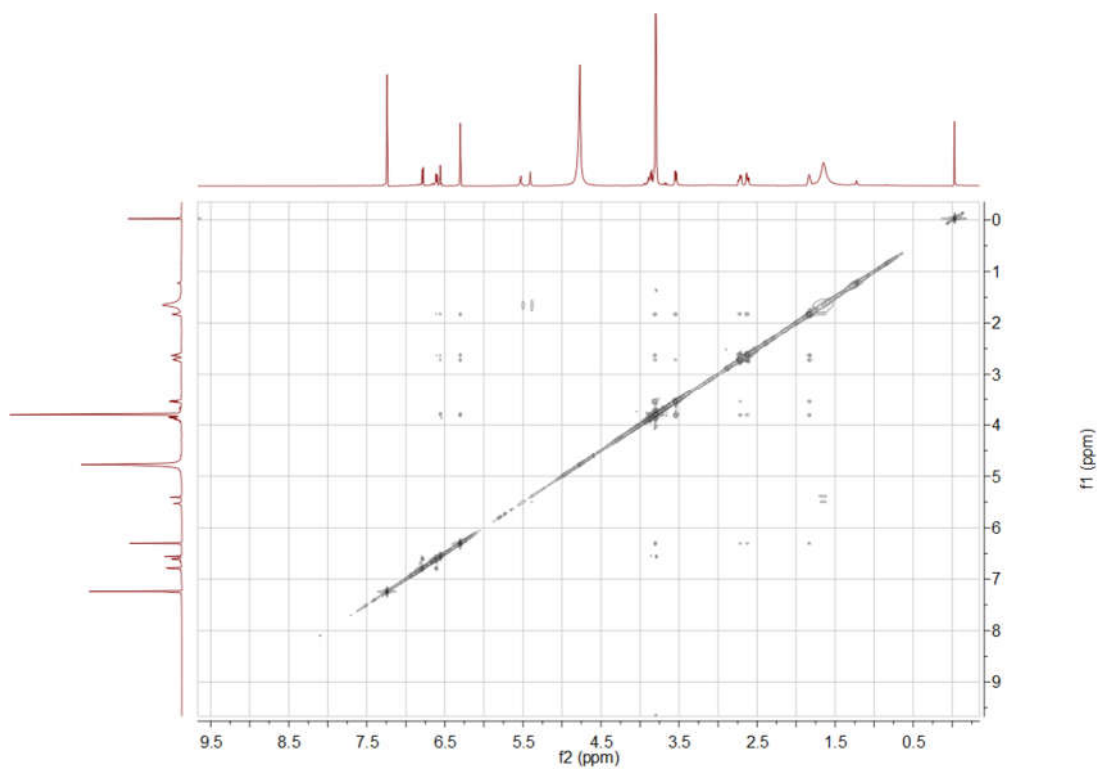

**Fig S43. ROESY spectrum of 9**

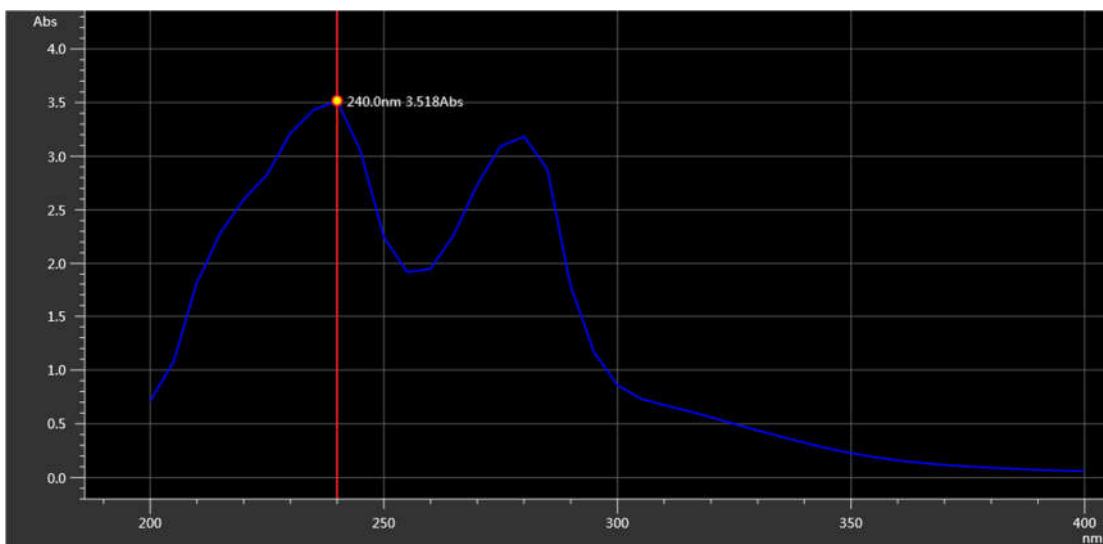

**Fig S44. UV spectrum of 9**

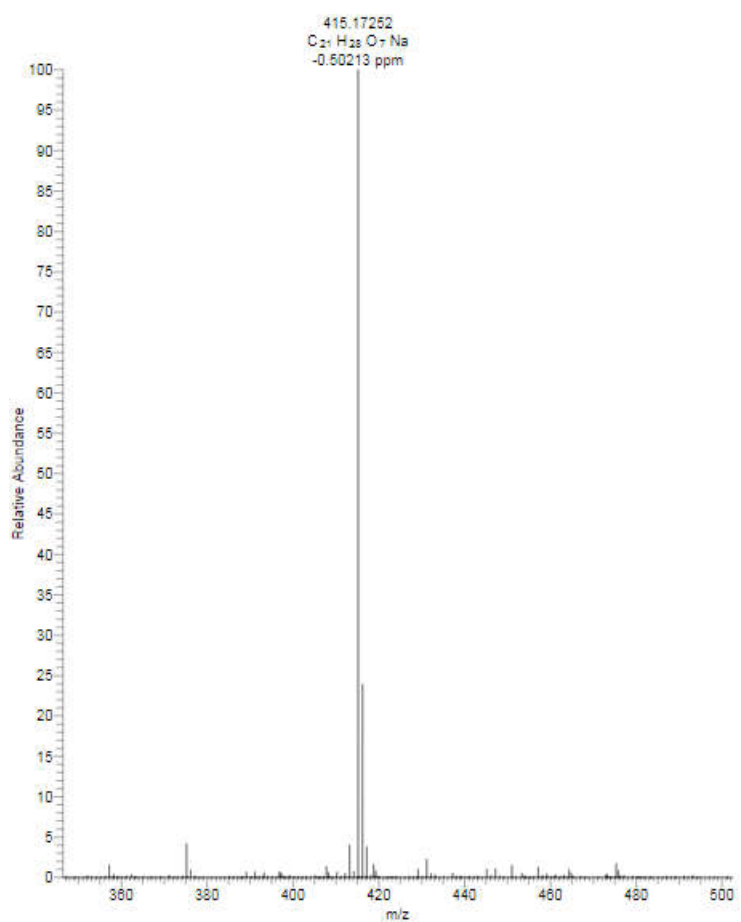

**Fig S45. HR-ESI-MS of 9**

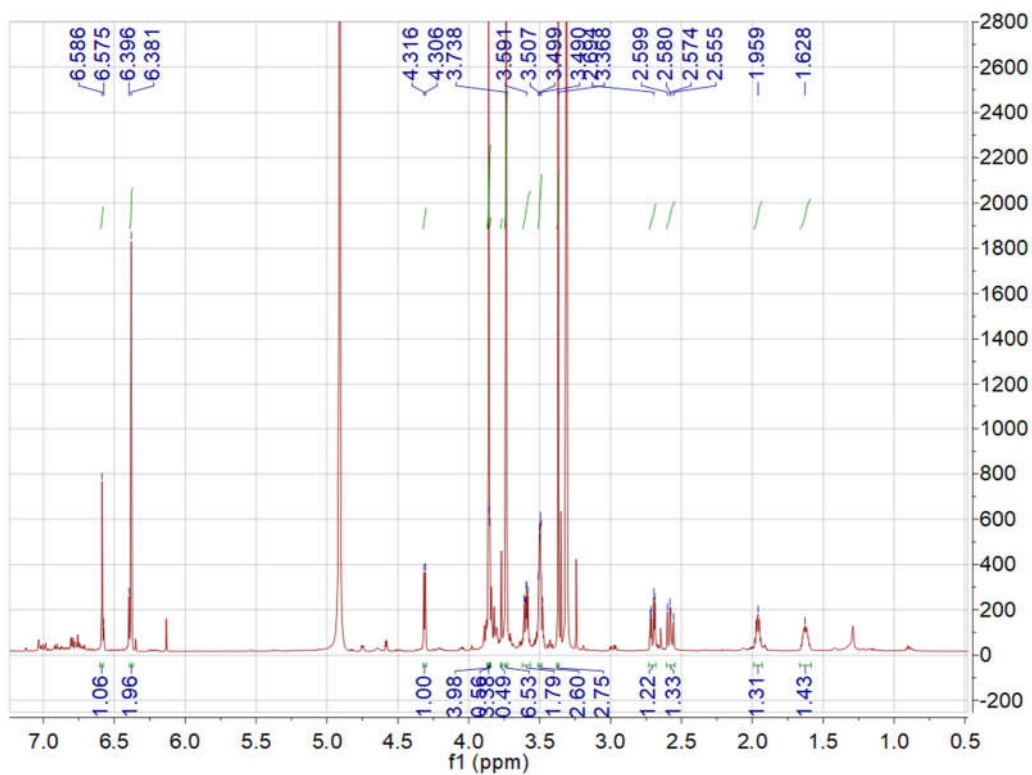

Fig S46. The  $^1\text{H}$ -NMR spectrum of 11

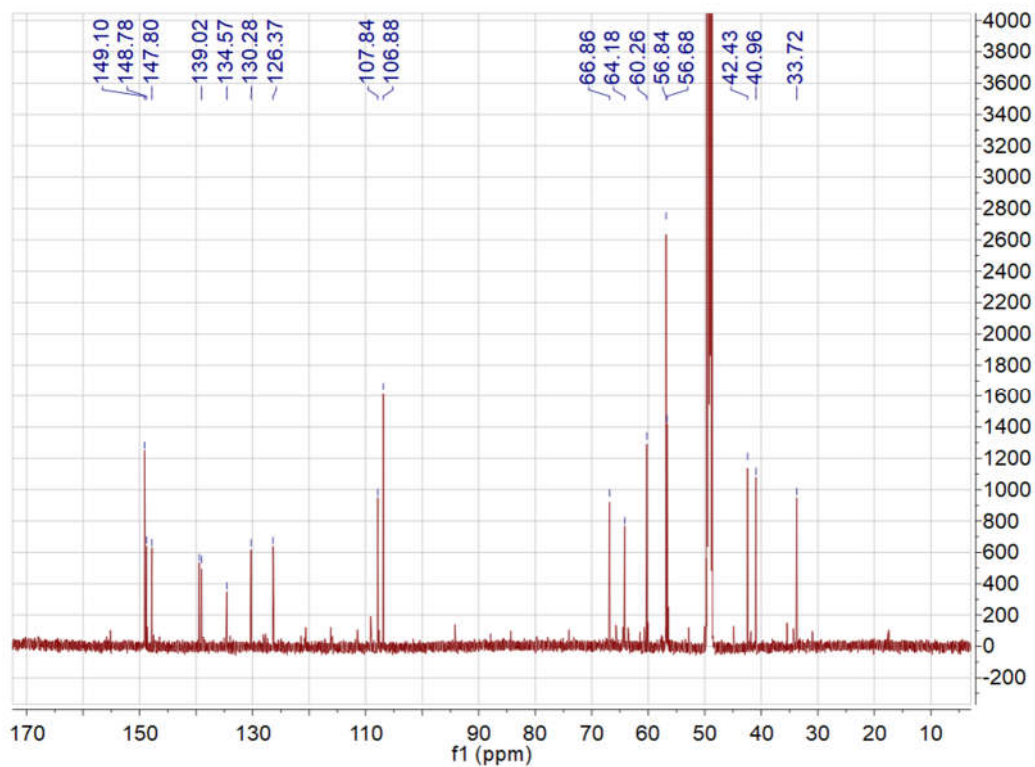

Fig S47. The  $^{13}\text{C}$ -NMR spectrum of 11

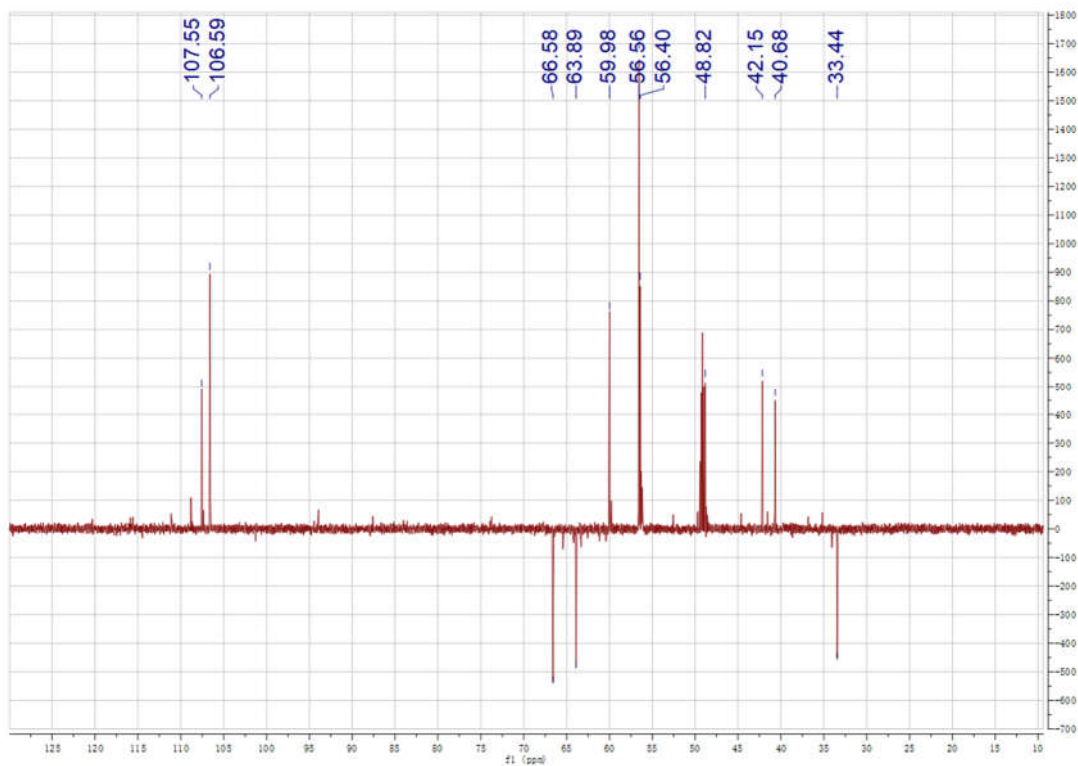

**Fig S48.  $^{13}\text{C}$ -NMR-DEPT spectrum of 11**

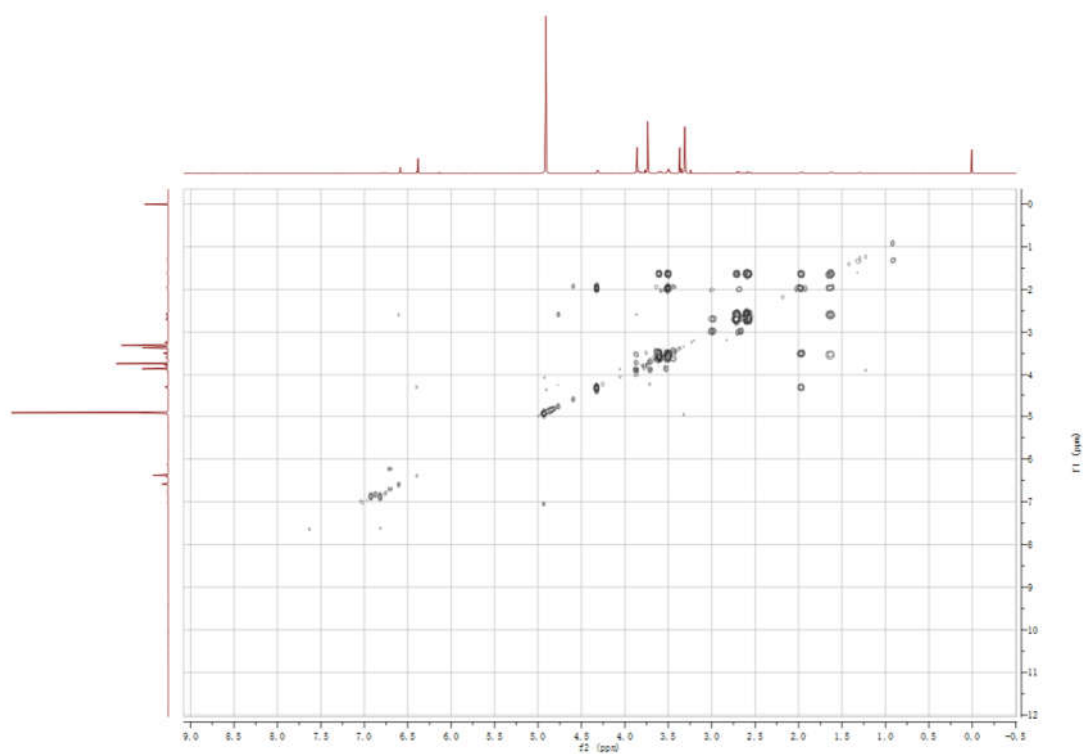

**Fig S49.  $^1\text{H}$ - $^1\text{H}$  COSY spectrum of 11**

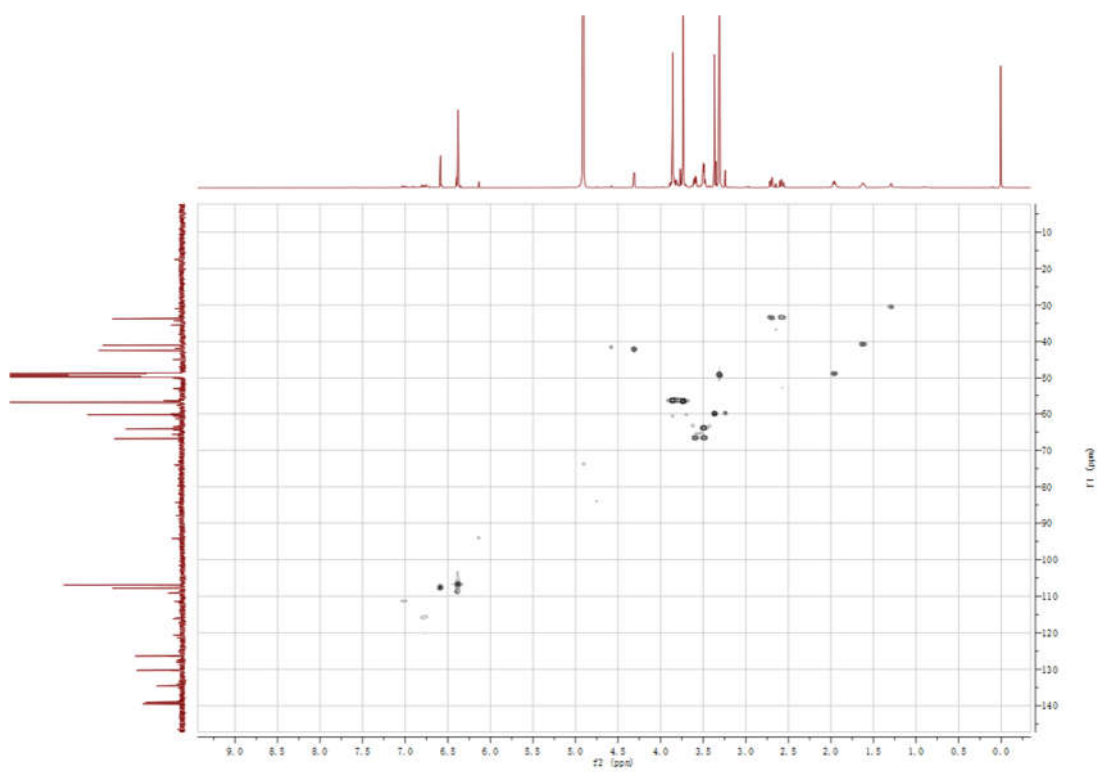

**Fig S50. HSQC spectrum of 11**

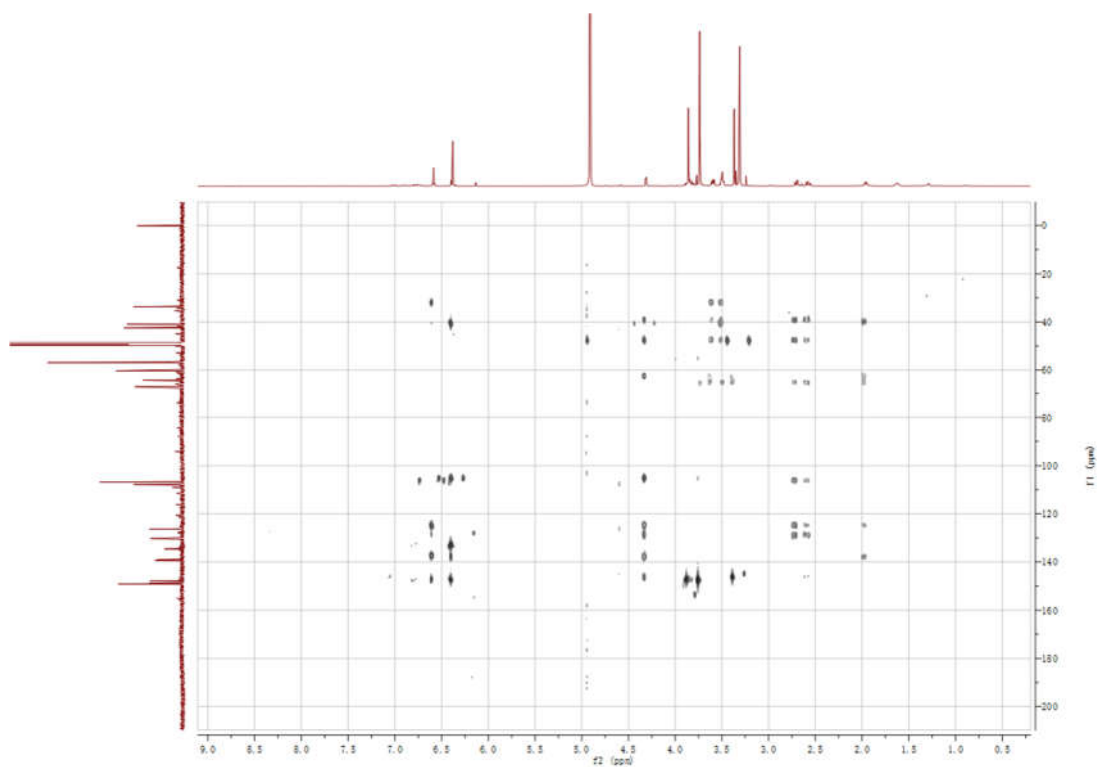

**Fig S51. HMBC spectrum of 11**

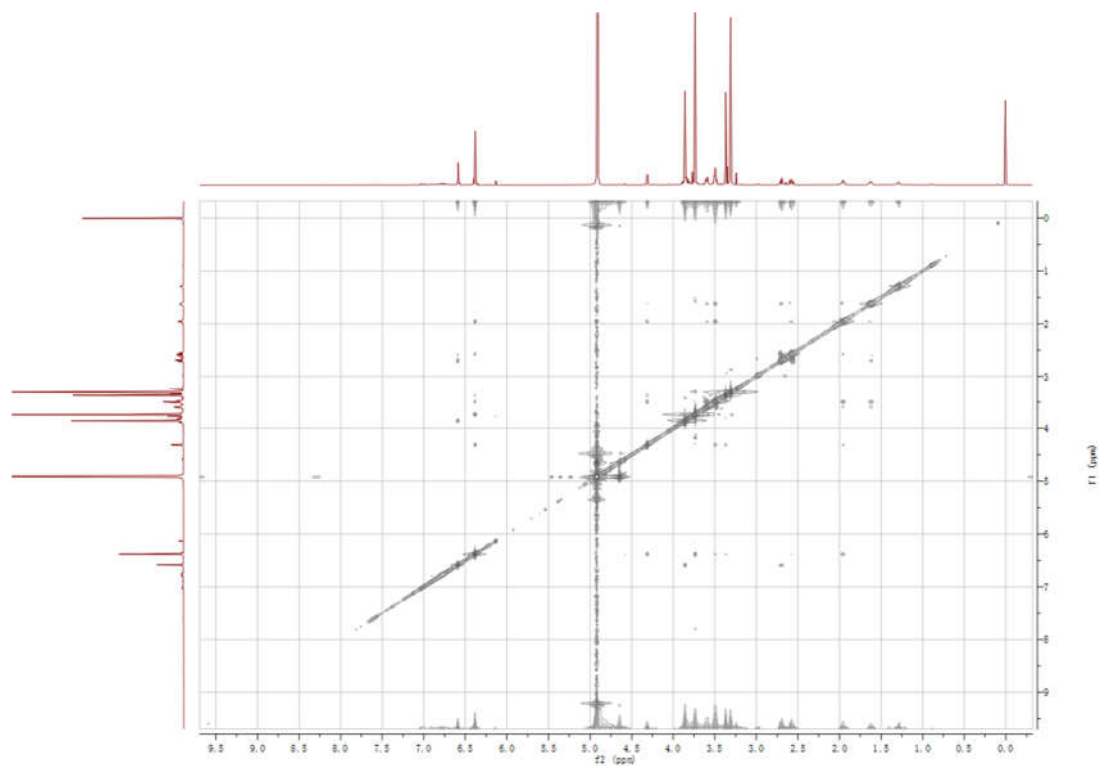

**Fig S52. ROESY spectrum of 11**

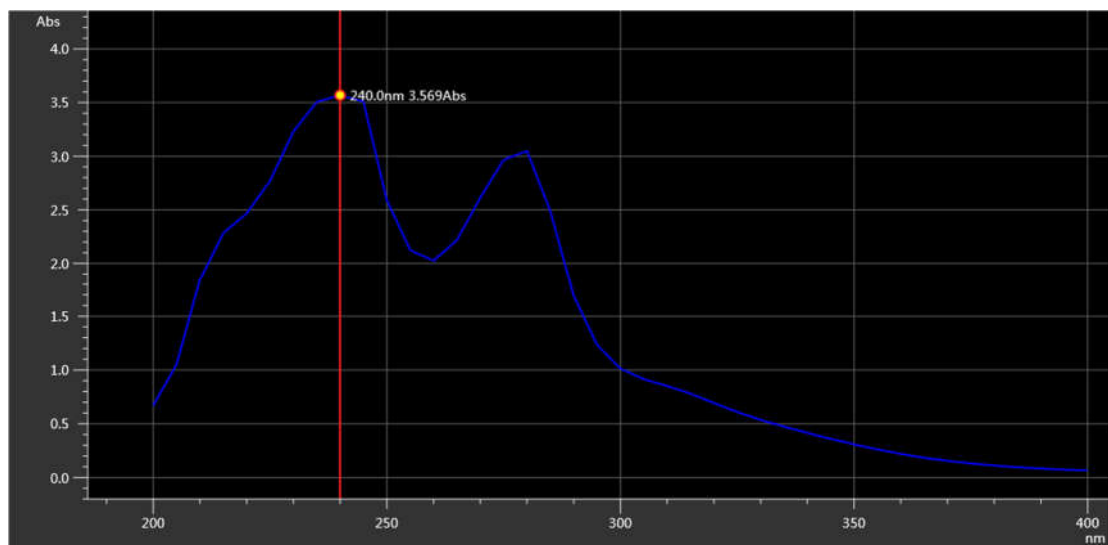

**Fig S53. UV spectrum of 11**

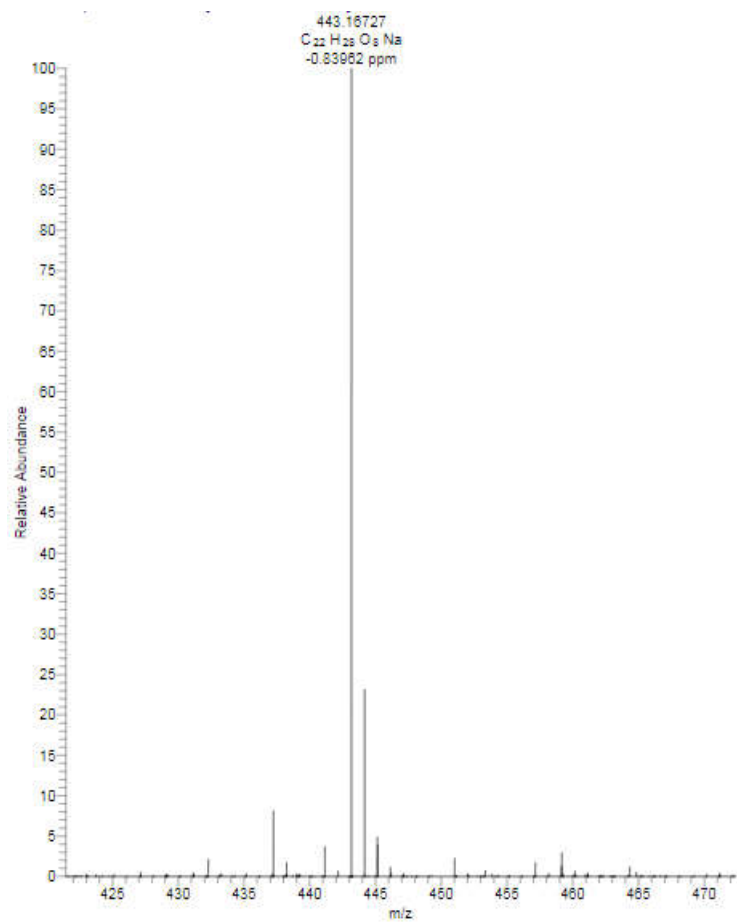

**Fig S54. HR-ESI-MS of 11**

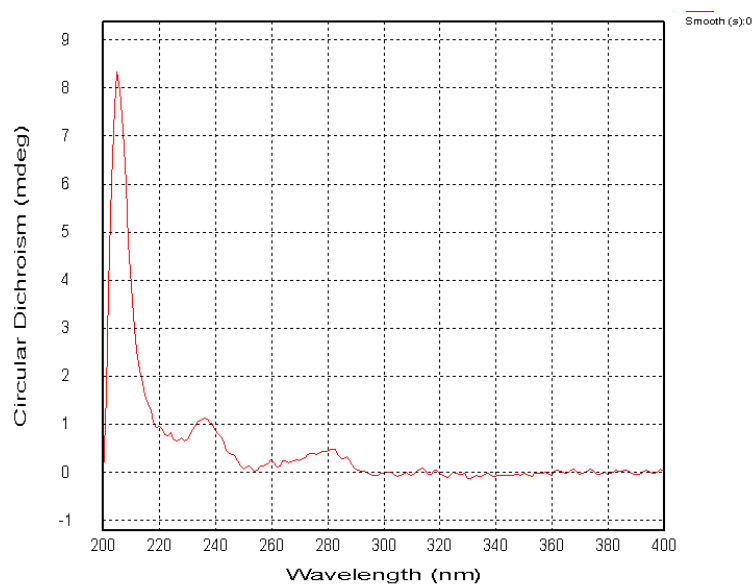

**Fig S55. CD spectrum of 1**

**Table S1.** The inhibitory effect of compounds **1-22** from *T. sinensis* on LPS induced NO production in RAW264.7 cells

| <b>Compound</b> | <b>IC<sub>50</sub> (μM)</b> | <b>Compound</b> | <b>IC<sub>50</sub> (μM)</b> |
|-----------------|-----------------------------|-----------------|-----------------------------|
| <b>1</b>        | >20                         | <b>12</b>       | >20                         |
| <b>2</b>        | >20                         | <b>13</b>       | >20                         |
| <b>3</b>        | >20                         | <b>14</b>       | >20                         |
| <b>4</b>        | >20                         | <b>15</b>       | >20                         |
| <b>5</b>        | >20                         | <b>16</b>       | >20                         |
| <b>6</b>        | >20                         | <b>17</b>       | >20                         |
| <b>7</b>        | >20                         | <b>18</b>       | >20                         |
| <b>8</b>        | >20                         | <b>19</b>       | >20                         |
| <b>9</b>        | >20                         | <b>20</b>       | 17.43 ± 2.06                |
| <b>10</b>       | >20                         | <b>21</b>       | >20                         |
| <b>11</b>       | >20                         | <b>22</b>       | >20                         |
| dexamethasone   | 9.58 ± 3.34                 |                 |                             |
